# 3D Epigenomic Characterization Reveals Insights Into Gene Regulation and Lineage Specification During Corticogenesis

**Authors:** Michael Song<sup>1,2,\*</sup>, Mark-Phillip Pebworth<sup>3,4,\*</sup>, Xiaoyu Yang<sup>1,\*</sup>, Armen Abnoui<sup>5</sup>, Changxu Fan<sup>6,7</sup>, Jia Wen<sup>8</sup>, Jonathan D. Rosen<sup>9</sup>, Mayank NK Choudhary<sup>6,7</sup>, Xiekui Cui<sup>1</sup>, Ian R. Jones<sup>1</sup>, Seth Bergenholtz<sup>1</sup>, Ugomma C. Eze<sup>4,9</sup>, Ivan Juric<sup>5</sup>, Bingkun Li<sup>1</sup>, Lenka Maliskova<sup>1</sup>, Weifang Liu<sup>9</sup>, Alex A. Pollen<sup>4,11</sup>, Yun Li<sup>8,9,12</sup>, Ting Wang<sup>6,7</sup>, Ming Hu<sup>5,\*,#</sup>, Arnold R. Kriegstein<sup>4,11,#</sup>, Yin Shen<sup>1,11,#</sup>

## Affiliations

<sup>1</sup>Institute for Human Genetics, University of California, San Francisco, San Francisco, CA, USA.

<sup>2</sup>Pharmaceutical Sciences and Pharmacogenomics Graduate Program, University of California, San Francisco, San Francisco, CA, USA.

<sup>3</sup>Biomedical Sciences Graduate Program, University of California, San Francisco, San Francisco, CA, USA.

<sup>4</sup>The Eli and Edythe Broad Center of Regeneration Medicine and Stem Cell Research, UCSF, San Francisco, CA, USA.

<sup>5</sup>Department of Quantitative Health Sciences, Lerner Research Institute, Cleveland Clinic Foundation, Cleveland, OH, USA.

<sup>6</sup>Department of Genetics, Washington University School of Medicine, St. Louis, MO, USA.

<sup>7</sup>The Edison Family Center for Genome Sciences and Systems Biology, Washington University School of Medicine, St. Louis, MO, USA.

<sup>8</sup>Department of Genetics, University of North Carolina, Chapel Hill, NC, USA.

<sup>9</sup>Department of Biostatistics, University of North Carolina, Chapel Hill, NC, USA.

<sup>10</sup>Medical Scientist Training Program, University of California, San Francisco, San Francisco, CA, USA.

<sup>11</sup>Department of Neurology, University of California, San Francisco, San Francisco, CA, USA

<sup>12</sup>Department of Computer Science, University of North Carolina, Chapel Hill, NC, USA.

\*These authors contributed equally to the work.

#Corresponding authors: Ming Hu [hum@ccf.org](mailto:hum@ccf.org), Arnold R. Kriegstein [Arnold.Kriegstein@ucsf.edu](mailto:Arnold.Kriegstein@ucsf.edu), and Yin Shen [Yin.Shen@ucsf.edu](mailto:Yin.Shen@ucsf.edu).

## 47 **Abstract**

48

49 Lineage-specific epigenomic changes during human corticogenesis have previously  
50 remained elusive due to challenges with tissue heterogeneity and sample availability.  
51 Here, we analyze cis-regulatory chromatin interactions, open chromatin regions, and  
52 transcriptomes for radial glia, intermediate progenitor cells, excitatory neurons, and  
53 interneurons isolated from mid-gestational human brain samples. We show that  
54 chromatin looping underlies transcriptional regulation for lineage-specific genes, with  
55 transcription factor motifs, families of transposable elements, and disease-associated  
56 variants enriched at distal interacting regions in a cell type-specific manner. A subset of  
57 promoters exhibit unusually high degrees of chromatin interactivity, which we term super  
58 interactive promoters. Super interactive promoters are enriched for critical lineage-  
59 specific genes, suggesting that interactions at these loci contribute to the fine-tuning of  
60 cell type-specific transcription. Finally, we present CRISPRview, a novel approach for  
61 validating distal interacting regions in primary cells. Our study presents the first  
62 characterization of cell type-specific 3D epigenomic landscapes during human  
63 corticogenesis, advancing our understanding of gene regulation and lineage specification  
64 during human brain development.

65

## 66 **Introduction**

67

68 The human cortex is a complex, heterogeneous structure that undergoes extensive  
69 expansion during development, a process which is markedly different and features  
70 distinct cell types from mouse cortical development. Previous studies utilized single cell  
71 RNA sequencing (scRNA-seq) to unravel the transcriptomic diversity of the developing  
72 cortex, revealing at least nine major cell types and up to 26 distinct subtypes in the dorsal  
73 cortex alone<sup>1,2</sup>. Much of this diversity arises from cortical stem cells known as radial glia  
74 (RG), whose cell bodies reside in the germinal zones (GZs) of the dorsal and ventral  
75 cortex. In the dorsal cortex, RG divide asymmetrically to give rise to intermediate  
76 progenitor cells (IPCs), which proliferate and differentiate into excitatory neurons (eNs)<sup>3,4</sup>.  
77 These newborn neurons undergo radial migration until they reach the cortical plate (CP),



78 where they mature and undergo synaptogenesis<sup>5</sup>. Meanwhile, interneurons (iNs)  
79 produced in the ventral cortex migrate tangentially into the dorsal cortex through the  
80 marginal and germinal zones<sup>6</sup>. These processes result in a CP consisting primarily of eNs  
81 and iNs and a GZ where all four cell types are intermixed.

82

83 Dynamic changes in the epigenomic landscape have been shown to play a critical role in  
84 development and cell fate commitment, for instance through the rewiring of physical  
85 chromatin loops between promoters and distal regulatory elements<sup>7</sup>. These regulatory  
86 interactions are of particular interest as their dysregulation has been linked to complex  
87 diseases and traits<sup>8,9</sup>. Despite their utility, detailed epigenomic characterizations are still  
88 absent for specific cell types in the developing cortex due to shortcomings associated  
89 with the analysis of bulk tissues<sup>10,11</sup>. Here, we present a novel strategy for isolating RG,  
90 IPCs, eNs, and iNs from mid-gestational human brain samples, enabling the cell type-  
91 specific profiling of their epigenomic features. In addition, we present CRISPRview, a  
92 technique for validating distal regulatory regions in primary cells, demonstrating that  
93 *GPX3*, *TNC*, and *HES1* are regulated by distal enhancers in RG. Our results identify novel  
94 mechanisms underlying gene regulation and lineage specification during corticogenesis,  
95 providing a framework for the elucidation of diverse processes in development and  
96 disease.

97

## 98 **Results**

99

### 100 **Isolation of specific cell populations from the developing human cortex.**

101

102 To isolate four specific cell populations (RG, IPCs, eNs, and iNs) from mid-gestational  
103 human brain samples between gestational weeks (GW) 15 to 22 (**Supplementary Table**  
104 **1**), we adapted a previously reported approach for isolating RG from human cortical  
105 samples using fluorescence-activated cell sorting (FACS)<sup>12</sup>. Specifically, we incorporated  
106 markers for additional cell types from a recently published scRNA-seq dataset in the  
107 human neocortex<sup>1</sup>. Microdissected GZ and CP samples were dissociated, stained using  
108 antibodies for EOMES, SOX2, PAX6, and SATB2, then partitioned into their constituent

109 populations using FACS (**Fig. 1a and Supplementary Fig. 1**). IPCs were first isolated as  
110 the EOMES+ population. eNs were isolated from the EOMES- and SOX2- population  
111 based on high expression of SATB2, which marks both newborn and mature eNs at the  
112 ages of the samples<sup>1</sup>. RG were isolated based on the high expression of both SOX2 and  
113 PAX6, and iNs were isolated based on medium SOX2 and low PAX6 expression.

114

115 The gene expression profiles of the sorted cell populations were both consistent with  
116 cellular identity and reproducible between individuals (**Fig. 1b and Supplementary Fig.**  
117 **2a**). Sorted RG expressed *VIM*, *HES1*, *GPX3*, and *GFAP*, with little to no expression of  
118 marker genes for other cell types, whereas sorted IPCs expressed the IPC marker genes  
119 *EOMES*, *SSTR2*, and *NEUROD4*. In concordance with previous reports, *PAX6* was  
120 expressed in both RG and IPCs. Sorted eNs expressed the eN marker genes *SLA*,  
121 *SLC17A7*, *SATB2*, and *TBR1*, whereas *DLX1*, *DLX2*, and *GAD1* were exclusively  
122 detected in sorted iNs. When compared with aggregated scRNA-seq gene expression  
123 profiles<sup>1</sup>, our sorted cell populations exhibited the highest correlation with their  
124 corresponding subtypes while also showing reduced correlation with cells from the  
125 endothelial, mural, microglial, and choroid plexus lineages (**Fig. 1c**). Based on these  
126 results, we determined that our sorting strategy was robust and our sorted cell populations  
127 were suitable for additional epigenomic profiling.

128

### 129 **Characterization of 3D epigenomic landscapes during corticogenesis.**

130

131 We performed H3K4me3-centric proximity ligation-assisted ChIP-seq (PLAC-seq) to  
132 identify chromatin interactions at active promoters, assay for transposase-accessible  
133 chromatin using sequencing (ATAC-seq) to demarcate open chromatin regions, and RNA  
134 sequencing (RNA-seq) to profile transcriptomes in the sorted RG, IPCs, eNs, and iNs  
135 (**Fig. 1d and Supplementary Table 2**). We first confirmed the reproducibility of all PLAC-  
136 seq and ATAC-seq replicates (**Supplementary Fig. 2b and 2c**). Next, we applied the  
137 MAPS pipeline<sup>13</sup> to call significant H3K4me3-mediated cis-regulatory chromatin  
138 interactions in merged replicates for each cell type at a resolution of 5 kb. We identified  
139 35,552, 26,138, 29,104 and 22,598 MAPS interactions for RG, IPCs, eNs, and iNs,

140 respectively, with approximately 85% of the interactions classified as anchor to non-  
141 anchor (XOR), and the remaining interactions classified as anchor to anchor (AND) (**Fig.**  
142 **1e and Supplementary Fig. 3a and 3b**). The median interaction distance was between  
143 170 kb to 230 kb for each cell type (**Fig. 1f**), and the majority of interactions occurred  
144 within TADs in GZ and CP tissues<sup>10</sup> (**Supplementary Fig. 3c**).

145

146 **H3K4me3-mediated chromatin interactions contribute to cell type-specific gene**  
147 **expression.**

148

149 Since H3K4me3 is a histone mark associated with active promoters, we were interested  
150 to determine to what extent H3K4me3-mediated chromatin interactions influenced gene  
151 expression. First, we observed that the sorted cell populations clustered by  
152 developmental age based on their interaction strengths (**Fig. 2a**). This is consistent with  
153 iNs at this age possessing several characteristics of progenitor cells such as high SOX2  
154 expression (**Fig. 1a and 1b**). Genes participating in cell type-specific interactions are  
155 enriched for biological processes associated with their respective cell types, including cell  
156 proliferation for RG and IPCs, neuron projection development for IPCs and eNs, and  
157 synaptogenesis for eNs (**Supplementary Fig. 4a and Supplementary Table 3**). In  
158 addition, based on comparing interaction strength and gene expression side-by-side, we  
159 observe the two to be generally correlated (**Fig. 2a**). In fact, interaction strength and gene  
160 expression are globally correlated across all pairwise comparisons of cell types (**Fig. 2b**  
161 **and Supplementary Fig. 4b**), suggesting that gene expression is orchestrated by  
162 physical chromatin looping in a manner that is highly cell type-specific.

163

164 To investigate how chromatin interactions contribute to gene regulation in greater detail,  
165 we took advantage of the enrichment of open chromatin regions at distal interacting  
166 regions (**Fig. 2c and Supplementary Fig. 4c**) and performed transcription factor (TF)  
167 motif enrichment analysis using HOMER<sup>14</sup> at the set of cell type-specific distal interacting  
168 regions for each cell type (**Fig. 2d and Supplementary Table 4**). PAX6, EOMES, and  
169 TBR1 are the most highly enriched motifs in RG, IPCs, and eNs, respectively,  
170 recapitulating their sequential expression along this developmental axis<sup>15</sup>. Meanwhile,

171 motifs for progenitor-specific TFs including EMX1, EMX2, and LHX2 are enriched in RG  
172 and IPCs. The motif for RFX4, which was previously identified as an RG marker in the  
173 murine midbrain as well as the human telencephalon, is enriched in RGs<sup>1,16</sup>. Finally, the  
174 DLX1, DLX2, DLX6, GSX2, and LHX6 motifs are enriched in iNs, consistent with their  
175 roles in iN maturation and function<sup>17-19</sup>. Overall, our approach identifies both known and  
176 novel associations between TF binding at distal interacting regions and processes linked  
177 to cellular identity.

178

### 179 **Super interactive promoters are enriched for lineage-specific genes.**

180

181 The number of chromatin interactions at H3K4me3-marked promoters is only modestly  
182 correlated with gene expression (**Supplementary Fig. 5a**). One explanation is that  
183 individual genes are expressed to varying degrees in the context of their diverse cellular  
184 functions, and regulatory elements are better described as fine-tuning rather than  
185 independently inducing or silencing the expression of their cognate promoters. Multiple  
186 regulatory interactions can also exert synergistic or nonlinear effects on gene expression.  
187 To examine the relationship between gene expression and chromatin interactivity in  
188 greater detail, we first demonstrate that cell type-specific genes tend to have more  
189 interactions than shared genes across all cell types (**Fig. 3a and Supplementary Fig.**  
190 **5b**). Next, by ranking promoter-containing anchor bins according to their cumulative  
191 interaction scores, we identify a subset of promoters with unusually high degrees of  
192 chromatin interactivity, which we term super interactive promoters (SIPs) (**Fig. 3b**). In  
193 total, we annotate 755, 765, 638, and 663 SIPs in RG, IPCs, eNs, and iNs, respectively  
194 (**Fig. 3c and Supplementary Table 5**). SIPs are enriched for key lineage-specific genes  
195 including *GFAP* and *HES1* for RG, *EOMES* for IPCs, *SATB2* for eNs, and *GAD1*, *GAD2*,  
196 *DLX5*, *DLX6*, and *LHX6* for iNs. SIPs are also frequently shared across multiple cell types.  
197 For example, we identify SIPs for *FOXP1* and *POU3F3* (*BRN1*) in all four cell types,  
198 *SOX2* in the progenitor-like RG, IPCs, and iNs, and *TBR1* in the eN-like IPCs and eNs.  
199 Interestingly, a large number of promoters for lincRNA genes including *LINC00461* and  
200 *LINC01551* are annotated as SIPs, consistent with their patterns of expression in the  
201 developing cortex<sup>20</sup>. Globally, SIPs are enriched for in cell types with the highest

202 expression of their genes among all four cell types, supporting their putative roles in  
203 lineage specification (**Fig. 3d**). To assess whether SIPs are a general feature for other  
204 cell types, we expanded our analysis to hematopoietic lineages with published promoter  
205 capture Hi-C datasets<sup>21</sup>. Consistent with our results in brain cells, SIPs identified in  
206 neutrophils, naive CD4+ T cells, monocytes, megakaryocytes, and erythroblasts are also  
207 enriched for cell type-specific over shared genes (**Fig. 3e**). Based on these lines of  
208 evidence, SIPs may represent a general mechanism used by cells to maintain the precise  
209 and robust expression of key genes underlying cellular identity and function.

210

### 211 **Specific families of transposable elements are implicated in SIP formation.**

212

213 Given the important roles SIPs may harbor in establishing cellular identity, we were  
214 interested in exploring potential mechanisms underlying their formation and evolution.  
215 Towards this goal, we evaluated the contribution of transposable elements (TEs), which  
216 are capable of propagating regulatory elements across the genome and influencing 3D  
217 genome architecture<sup>22-24</sup>. First, we analyzed the enrichment of TEs at the class, family,  
218 and subfamily levels in sequences defined by the union of SIPs and their distal interacting  
219 regions (SIP groups or SIPGs) (**Fig. 3f and Supplementary Fig. 6a-c**). Notably, the  
220 ERVL-MaLR family and many of its subfamilies are enriched in SIPGs across all four cell  
221 types. Since we detected the strongest enrichment of this family of TEs in eNs, we  
222 decided to focus on this particular lineage. In total, we identified 16 SIPGs in eNs that are  
223 statistically enriched for ERVL-MaLR TEs (hypergeometric test,  $P < 0.01$ ) (**Fig. 3g**). Next,  
224 we used HOMER to perform TF motif enrichment analysis at ERVL-MaLR TEs within  
225 these 16 SIPGs and determined ZNF143 to be the most enriched motif (**Fig. 3h**). ZNF143  
226 is an architectural protein which has previously been reported to mediate looping between  
227 promoters and distal regulatory elements<sup>25</sup>. Moreover, certain subfamilies of ERVL-MaLR  
228 TEs have been demonstrated to contribute to ZNF143 binding in 3T3 and HeLa cells<sup>26</sup>.  
229 The *ADRA2A* SIPG in eNs exhibited the highest enrichment of ERVL-MaLR-derived  
230 ZNF143 motifs (hypergeometric test,  $P=1.59 \times 10^{-6}$ ) (**Fig. 3i**) and was associated with  
231 elevated *ADRA2A* expression in eNs (**Supplementary Fig. 6d**). It spans 42 distal  
232 interacting regions, 25 of which contain ERVL-MaLR TEs, and 12 of which contain one

233 or more ERVL-MaLR-derived ZNF143 motifs (**Fig. 3j and Supplementary Fig. 6e**).  
234 Furthermore, ZNF143 motifs in TEs from multiple ERVL-MaLR subfamilies (THE1A,  
235 THE1C, MSTA) within the SIPG can be mapped back to ZNF143 motifs in the consensus  
236 sequences of the same subfamilies (**Supplementary Fig. 6f**). This supports a model in  
237 which ZNF143 motifs are coordinately expanded by ERVL-MaLR TE insertion, leading to  
238 increased binding site redundancy and strengthened assembly of the *ADRA2A* SIPG  
239 regulatory unit (**Fig. 3k**). Our results imply that TEs are capable of mediating the formation  
240 of higher order epigenomic features including SIPs<sup>27</sup>.

241

### 242 **Investigating features of the developmental trajectory from RG to eNs during** 243 **corticogenesis.**

244

245 Since RG, IPCs, and eNs represent a developmental trajectory from dorsal cortex  
246 progenitors to mature functional neurons, we grouped genes according to their  
247 expression and cumulative interaction scores along this axis and identified groups  
248 corresponding to RG, IPCs, and eNs (groups 1-3) that are enriched for lineage-defining  
249 genes and biological processes (**Fig. 4a, Supplementary Fig. 7, and Supplementary**  
250 **Table 6**). We also identified groups with decreasing expression and increasing chromatin  
251 interactivity (group 4) as well as increasing expression and decreasing chromatin  
252 interactivity (group 5) from RG to eNs, which could represent late-silenced and early-  
253 silenced genes, respectively. Late-silenced genes are enriched for chromatin remodeling  
254 and epigenetic regulation terms, whereas early-silenced genes are enriched for eN-  
255 specific signatures. These results demonstrate that gene expression can be mediated by  
256 distinct modes of chromatin-mediated regulation during development.

257

258 Human corticogenesis is dramatically distinct from that in other mammalian species,  
259 driven in large part by the increased diversity and proliferative capacity of cortical  
260 progenitors during development which results in the increased size and complexity of the  
261 human brain<sup>28</sup>. In particular, Notch signaling genes have been implicated in the clonal  
262 expansion of RG, which constitute the major subtype of cortical progenitors in the  
263 cortex<sup>29,30</sup>. Here, we find that RG are enriched relative to other cell types for chromatin



264 interactions at Notch signaling genes from the AmiGO database<sup>31</sup> (**Fig. 4b**). Compared  
265 to other cell types, chromatin interactions in RG also target a significantly higher  
266 proportion of human gained enhancers identified through comparative analyses of  
267 H3K4me2 and H3K27ac ChIP-seq signal in human, rhesus macaque, and mouse  
268 brains<sup>32</sup>. Therefore, 3D epigenomic landscapes are capable of identifying lineage-specific  
269 pathways contributing to human-specific aspects of cortical development. In addition, we  
270 provide detailed annotations of gene targets for human gained enhancers and in vivo-  
271 validated enhancer elements from the Vista Enhancer Browser<sup>33</sup> in **Supplementary**  
272 **Table 7**.

273

### 274 **Leveraging 3D epigenomic landscapes to partition heritability for complex** 275 **neuropsychiatric disorder- and trait-associated variants.**

276

277 Chromatin interactions identified in our sorted cell populations represent a unique in vivo  
278 resource for mapping complex neuropsychiatric disorder- and trait-associated variants to  
279 their target genes (**Figure 4c and Supplementary Table 8**). They additionally enable the  
280 assessment of cell type-specific patterns of SNP heritability. To partition SNP heritability  
281 using our 3D epigenomic annotations, we employed linkage disequilibrium score  
282 regression (LDSC)<sup>34,35</sup> using summary statistics from genome wide association studies  
283 (GWAS) for the following neuropsychiatric traits: Alzheimer's disease (AD), attention  
284 deficit hyperactivity disorder (ADHD)<sup>36</sup>, autism spectrum disorder (ASD)<sup>37</sup>, bipolar  
285 disorder (BD)<sup>38</sup>, intelligence quotient (IQ)<sup>39</sup>, major depressive disorder (MDD)<sup>40</sup>, and  
286 schizophrenia (SCZ)<sup>41</sup>. Overall, we observed significant levels of heritability enrichment  
287 in 3D anchor bins for every cell type and neuropsychiatric trait we evaluated ( $15.13 <$   
288  $\text{enrichment score} < 51.57$ ,  $1.27 \times 10^{-40} < P < 0.02$ ) (**Fig. 4d**). These findings are largely  
289 expected as the majority of interacting promoters are shared across our cell types. When  
290 we restricted our analysis to 3D target bins, we observed dramatically distinct patterns of  
291 cell type-specific heritability enrichment (**Fig. 4e**). For example, ASD SNP heritability was  
292 significantly enriched for only in RG and eNs ( $P = 1.07 \times 10^{-3}$  and  $4.75 \times 10^{-4}$ , respectively),  
293 and AD SNP heritability was significantly enriched for only in RG ( $P = 3.99 \times 10^{-6}$ ). Our  
294 findings reflect the cell type-specific nature of distal regulatory elements that are



295 dysregulated during disease and underscore the importance of leveraging 3D epigenomic  
296 annotations to interpret variants that are located in non-coding regions of the genome.

297

### 298 **Functional characterization of enhancers in primary cells using CRISPRview.**

299

300 Validating distal regulatory elements in primary cells has historically been challenging,  
301 with most experiments to date performed using cell lines or iPSC-derived cells<sup>10,42</sup>. Here,  
302 we present CRISPRview, a novel approach combining CRISPRi, RNAscope, and  
303 immunostaining to validate enhancers in heterogeneous cultures of primary cells at the  
304 single cell level (**Fig. 5a**). We use CRISPRview to validate multiple enhancers in RG at  
305 the *GPX3*, *TNC*, and *HES1* loci, all of which harbor RG-specific chromatin interactions  
306 and are differentially expressed in RG (**Fig. 5b-d**). Furthermore, the promoters for *TNC*  
307 and *HES1* are annotated as SIPs in RG. First, sgRNAs were designed to target open  
308 chromatin regions physically interacting with the promoters of *GPX3*, *TNC*, and *HES1*  
309 (**Supplementary Table 9**). Next, primary cultures of microdissected and dissociated GZ  
310 samples between GW17 to GW19 were infected with lentivirus expressing the  
311 experimental sgRNA, dCas9-KRAB, and mCherry in combination with lentivirus  
312 expressing control sgRNA, dCas9-KRAB, and GFP. After five additional days in culture,  
313 the cells were fixed and stained using antibodies for mCherry, GFP, the RG marker  
314 GFAP, and RNAscope probes (ACD<sup>TM</sup>) targeting intronic regions of the genes of interest.  
315 Finally, high resolution images were taken using confocal microscopy, and the number of  
316 punctate dots representing individual nascent transcripts were compared between  
317 experimental (mCherry+) and control (GFP+) sgRNA-treated GFAP+ RG (**Fig. 5b-d**). The  
318 SMART-Q pipeline was specifically developed in our lab for image analysis (see attached  
319 manuscript, submitted).

320

321 All four regions interacting with the *GPX3* promoter (regions 1-4) were found to exhibit  
322 downregulation of *GPX3* expression upon CRISPRi targeting (**Fig. 5b**). Notably, region 1  
323 overlaps both a human gained enhancer<sup>32</sup> and a Vista enhancer element (mm1343)<sup>33</sup>,  
324 supporting its function as an enhancer in RG. Next, we investigated the locus for *TNC*, a  
325 RG-specific gene implicated in neuronal migration, axon guidance, and synaptic plasticity.

326 We found that two of its interacting regions exhibited significant downregulation of *TNC*  
327 expression upon CRISPRi targeting (regions 1 and 2), but that silencing of its other two  
328 interacting regions did not result in notable changes in *TNC* expression (regions 3 and 4)  
329 (**Fig. 5c**). This could be due to the presence of alternative regulatory elements or  
330 structural interactions at these loci. Finally, HES1 is a lineage-defining TF for RG, and we  
331 positively validated all three regions that were found to interact with the *HES1* promoter  
332 (regions 1-3) (**Fig. 5d**). The observation of small but significant changes in gene  
333 expression upon CRISPRi targeting supports the hypothesis that multiple interactions  
334 work in concert to titrate the expression of key genes linked to cellular identity. In addition,  
335 the observed broad distributions of nascent transcript counts likely reflects the stochastic  
336 nature of transcription in single cells, stressing the importance of employing an approach  
337 combining resolution, sensitivity, and cell type-specificity for validating enhancers in  
338 single cells.

339

## 340 **Discussion**

341

342 Recent publications leveraging single cell sequencing have highlighted the heterogeneity  
343 of the developing human cortex, underscoring the necessity of studying epigenomic  
344 regulation in a cell type-specific manner. Within the dorsal cortex alone, there are a  
345 massive variety of cell types from multiple sources both within and outside the developing  
346 neural tube, including RG, IPCs, eNs, MGE-derived iNs, CGE-derived iNs, microglia,  
347 endothelial cells, and subplate neurons. Despite large differences in maturation state and  
348 lineage, many of these cell types share intriguing similarities in terms of gene expression.  
349 For example, iNs express a number of TFs typically associated with RG proliferation such  
350 as *SOX2* or eN differentiation such as *ASCL1* and *NPAS3*<sup>1</sup>. Therefore, bulk  
351 measurements cannot reliably reveal the nuanced epigenomic programs driving gene  
352 expression in each cell type. By profiling 3D epigenomic landscapes in specific cell  
353 populations during corticogenesis, we not only demonstrate that gene regulation is closely  
354 linked to chromatin interactivity, we also identify SIPs that are highly cell type-specific and  
355 enriched for key lineage-specific genes. We uncover a potential mechanism by which  
356 specific families of TEs propagate binding sites for architectural proteins, facilitating the

357 formation of multi-interaction clusters which may serve to sustain gene expression. While  
358 the analysis of TEs is currently constrained by the list of known motifs and the resolution  
359 of chromatin interactions identified in this study, future advances will help us further  
360 elucidate the contribution of TEs to 3D genome architecture and transcriptional regulation.

361  
362 Cortical progenitors, eNs, and iNs are highly divergent in terms of their diversity,  
363 proliferative capacity, distribution, and functional characteristics between humans and  
364 mice<sup>28</sup>. Therefore, processes occurring during human cortex development cannot be fully  
365 recapitulated with mouse models. These non-murine features also indicate that enhancer  
366 mutations in humans may not adequately phenocopy to mice. Our dataset provides a  
367 comprehensive catalog of annotations for human gained enhancers and complex  
368 neuropsychiatric disorder- or trait-associated variants in cell types that are intricately tied  
369 to human cortex development, enabling the interpretation and prioritization of regulatory  
370 sequences for follow-up studies.

371  
372 Finally, there is a need to perform cell type-specific validation for regulatory sequences in  
373 primary cells, especially as our understanding of epigenomic regulation matures over  
374 time. By combining immunostaining for cellular markers with the quantification of nascent  
375 transcripts in the nucleus, CRISPRview offers exquisite sensitivity and resolution for  
376 detecting cell type-specific changes in gene expression in single cells. Here, we used  
377 CRISPRview to successfully validate multiple regulatory elements in RG and observed  
378 subtle but significant changes in gene expression at the *GPX3*, *TNC*, and *HES1* loci.  
379 Further experiments leveraging CRISPRview in live tissue cultures should continue to  
380 reveal novel regulatory logic in a manner that is truly representative of the complex in vivo  
381 environment that is present during human cortex development.

382

### 383 **Acknowledgements**

384

385 This work was supported by the UCSF Weill Institute for Neuroscience Innovation Award  
386 (to Y.S. and A.R.K.), the National Institutes of Health (NIH) grants R01AG057497,  
387 R01EY027789 and UM1HG009402 (to Y.S.), R35NS097305 (to A.R.K.), the Hillblom

388 Foundation, and the American Federation for Aging Research New Investigator Award in  
389 Alzheimer's Disease (to Y.S). This work was also supported by NIH grants  
390 R01HL129132, U544HD079124, and R01MH106611 (to Y.L.), R01HG007175,  
391 U24ES026699, and U01HG009391 (to T.W.), and the American Cancer Society grant  
392 RSG-14-049-01-DMC (to T.W). M.S. is supported by T32GM007175. M.P. is supported  
393 by the National Science Foundation Graduate Research Fellowship grant number  
394 1650113. U.C.E. is supported by 5T32GM007618-42. This work was made possible in  
395 part by NIH grants P30EY002162 to the UCSF Core Grant for Vision Research,  
396 P30DK063720, and S101S10OD021822-01 to the UCSF Parnassus Flow Cytometry  
397 Core.

398

### 399 **Author contributions**

400

401 Y.S., A.A.P., and A.R.K. conceived the study. Y.S., M.H., A.A.P., A.R.K. supervised the  
402 study. M.S., M.P., X.Y., I.R.J., X.C., U.C.E., and L.M. performed experiments. M.S., A.A.,  
403 S.B., J.D.R., B.L., I.J., and M.H. performed computational analysis. C.F. and M.N.C.  
404 performed transposable element analysis under the supervision of T.W. J.W. and W.L.  
405 performed SNP heritability analysis under the supervision of Y.L. M.S., M.P., X.Y., and  
406 Y.S. analyzed and interpreted the data. Y.S., M.S., M.P., X.Y., and M.H prepared the  
407 manuscript with input from all other authors.

408

### 409 **Competing interests statement**

410

411 The authors declare no competing financial interests.

412

### 413 **Code availability statement**

414

415 A copy of the custom code used for data analysis and figure generation in this study is  
416 available upon request.

417

### 418 **Data availability statement**

419

420 All datasets used in this study (PLAC-seq, ATAC-seq, RNA-seq) are available at the  
421 Neuroscience Multi-Omic Archive (NeMO Archive) under controlled access. Chromatin  
422 interactions, open chromatin regions, and gene expression results for each cell type can  
423 be accessed from the NeMO Archive using the following link:  
424 <https://assets.nemoarchive.org/dat-UIoqy8b>

425

426 Data can also be visualized on the WashU Epigenome Browser using the following link:  
427 [http://epigenomegateway.wustl.edu/legacy/?genome=hg38&session=OCzw03b5lz&stat  
usId=1958712809](http://epigenomegateway.wustl.edu/legacy/?genome=hg38&session=OCzw03b5lz&stat<br/>428 usId=1958712809)

429

### 430 **Figure legends**

431

432 **Figure 1. Experimental design and general features of the 3D epigenomic**  
433 **landscape during corticogenesis.**

434

435 (a) Schematic of the sorting strategy. Within the dorsal cortex, the germinal zone (GZ) is  
436 populated by radial glia (RG), which extend fibers towards the cortical plate (CP). These  
437 RG divide asymmetrically to produce intermediate progenitor cells (IPCs), which  
438 differentiate into excitatory neurons (eNs) that migrate along RG fibers towards the CP.  
439 At the same time, interneurons (iNs) can be found in both the GZ and CP. Microdissected  
440 GZ and CP samples were dissociated into single cells before being fixed, stained with  
441 antibodies for EOMES, SOX2, PAX6, and SATB2, and sorted using FACS. (b) Heatmap  
442 showing expression of key marker genes for RG, IPCs, eNs, and iNs. (c) Heatmap  
443 showing correlations between gene expression profiles for sorted cell populations and  
444 aggregate gene expression profiles from scRNA-seq datasets in the developing cortex.  
445 Cell types include newborn iNs from the medial ganglionic eminence (MGE), ventral  
446 progenitors including RG and IPCs from the MGE, microglia, and choroid plexus cells. (d)  
447 WashU Epigenome Browser snapshot of a 360 kb region (chr17:72,970,000-  
448 73,330,000) showing IPC-specific chromatin interactions linked to *SSTR2* expression in  
449 IPCs. (e) Bar graph showing counts of MAPS interactions, with proportions of XOR (blue,

450 only one interacting bin contains H3K4me3 peaks) and AND (red, both interacting bins  
451 contain H3K4me3 peaks) interactions displayed for each cell type. **(f)** Cumulative  
452 distribution function (CDF) plots showing interaction distances for each cell type. **(g)**  
453 Histogram showing the numbers of MAPS interactions at each promoter for each cell  
454 type.

455

456 **Figure 2. H3K4me3-mediated chromatin interactions contribute to cell type-specific**  
457 **gene regulation.**

458

459 **(a)** Heatmaps displaying interaction scores (left) and gene expression (right) for unique  
460 XOR interactions grouped according to their cell type specificity. Hierarchical clustering  
461 dendrograms for each heatmap are also shown (top). **(b)** Scatterplot showing positive  
462 correlation between the difference in the number of MAPS interactions at each promoter  
463 and the difference in expression of the corresponding genes between RG and eNs  
464 (Pearson product-moment correlation coefficient, two-sided t-test,  $P < 2.2 \times 10^{-16}$ ). The  
465 fitted trendline based on linear regression is also shown. **(c)** Fold enrichment of open  
466 chromatin regions over distance-matched background regions in 1 Mb windows around  
467 distal interacting regions for MAPS interactions in RG. **(d)** Enrichment of TF motifs at  
468 open chromatin regions in cell type-specific interacting distal regions for each cell type.  
469 The color of each dot represents the degree of enrichment ( $-\log_{10}P$ -value) for each TF  
470 motif, and the size of each dot represents the gene expression of the corresponding TF.

471

472 **Figure 3. Super interactive promoters are enriched for lineage-specific genes.**

473

474 **(a)** CDF plots showing the numbers of MAPS interactions for shared versus cell type-  
475 specific genes in eNs (two sample t-test, two-sided,  $P = 1.40 \times 10^{-14}$ ). **(b)** Plots showing  
476 the ranked cumulative interaction scores for 3D anchor bins in each cell type, defined as  
477 the sum of the  $-\log_{10}FDR$  for MAPS interactions coincident to each bin. Super interactive  
478 promoters (SIPs) are defined as promoters located to the right of the knee of each curve  
479 (dashed lines). Example SIPs, including those for lineage-specific genes, are highlighted  
480 for each cell type. **(c)** Venn diagram displaying the cell type-specificity of SIPs in RG,

481 IPCs, eNs, and iNs. (d) The number of genes called as SIPs was divided by the total  
482 number of SIPs and non-SIPs for genes with the 1<sup>st</sup>, 2<sup>nd</sup>, 3<sup>rd</sup>, and 4<sup>th</sup> highest expression  
483 among all four cell types. The fold enrichment was calculated relative to the group with  
484 the 4<sup>th</sup> highest expression for each cell type. (e) Forrest plot showing that SIPs called in  
485 hematopoietic cells are also enriched for cell type-specific over shared genes. 95%  
486 confidence intervals are displayed. (f) Scatterplot showing both the enrichment and the  
487 number of observed copies of TE families in SIPGs for eNs. TE families occupying more  
488 than 1% of the genome are colored. (g) Scatterplot showing the enrichment of ERVL-  
489 MaLR TEs in SIPGs for eNs (hypergeometric P-value, see methods). SIPGs with 40 or  
490 more distal interacting bins and  $P < 0.01$  are highlighted. (h) Scatterplot showing the  
491 enrichment of TF motifs at ERVL-MaLR TEs in SIPGs highlighted in (g). Only TF motifs  
492 with length  $> 12$  bp are shown. (i) Scatterplot showing the enrichment of ZNF143 motifs  
493 at ERVL-MaLR TEs in SIPGs highlighted in (g) (Poisson distribution, see methods).  
494 ZNF143 motifs occurrences were detected using FIMO using a threshold of  $P = 0.0001$ .  
495 (j) WashU Epigenome Browser snapshot of the *ADRA2A* SIPG. MAPS interactions  
496 targeting the 12 distal interacting bins containing ERVL-MaLR-derived ZNF143 motifs are  
497 highlighted. (k) Potential mechanism for the contributions of TEs towards SIP formation.

498

499 **Figure 4. Investigating developmental trajectories during corticogenesis and**  
500 **partitioning heritability for complex neuropsychiatric disorders and traits.**

501

502 (a) Gene groups identified based on their changes in expression and chromatin  
503 interactivity along the transition from RG to eNs. Group 1 represents stem cell genes with  
504 decreasing expression and chromatin interactivity from RG to eNs. Group 2 represents  
505 IPC-specific genes with the highest expression and chromatin interactivity at the IPC  
506 stage. Group 3 represents genes with increasing expression and chromatin interactivity  
507 from RG to eNs. Groups 4 and 5 are characterized by anti-correlated expression and  
508 chromatin interactivity and may represent late-silenced and early-silenced genes,  
509 respectively. Representative genes and GO terms are shown for each group. (b) Bar  
510 graph showing the numbers of MAPS interactions at Notch signaling genes targeting bins  
511 with and without human gained enhancers in each cell type (Chi-square test). (c) Bar



512 graph showing the numbers of unique GWAS SNPs ( $P < 10^{-8}$ ) interacting with their  
513 nearest gene only, with both their nearest and distal genes, or with distal genes only for  
514 each cell type across all neuropsychiatric traits. **(d-e)** LDSC enrichment scores for each  
515 neuropsychiatric trait and cell type, stratified by 3D anchor and target bins. Results with  
516  $P > 0.05$  are indicated.

517

518 **Figure 5. Functional characterization of distal interacting regions using**  
519 **CRISPRview.**

520

521 **(a)** CRISPRview workflow. Image analysis was performed using the SMART-Q pipeline.  
522 **(b-d)** Functional characterization of distal interacting regions at the *GPX3*, *TNC*, and  
523 *HES1* loci. For each locus, a WashU Epigenome Browser snapshot shows chromatin  
524 interaction bridging the promoters of *GPX3*, *TNC*, and *HES1* and distal interacting regions  
525 containing open chromatin regions (highlighted) which were targeted by sgRNAs for  
526 CRISPRi silencing. Representative images show staining for RNAscope probes targeting  
527 intronic regions for the genes of interest (white), DAPI (blue), the RG marker GFAP (light  
528 blue), mCherry (red), and GFP (green). The scale bar is 50  $\mu\text{m}$ . Box plots show the results  
529 of CRISPRi silencing for each targeted region. The open circles represent single cells,  
530 and nascent transcript counts for experimental (mCherry+) versus control (GFP+)  
531 sgRNA-treated RG are represented on the y-axis (Student's t-test, two-tailed). The  
532 median, upper and lower quartiles, and 10% to 90% range are indicated.

533

534 **Supplemental Figure 1. Representative contour plots depicting FACS gating**  
535 **strategy.**

536

537 **(a)** Cells were separated from debris of various sizes based on the forward scatter area  
538 (FSC-A) and side scatter area (SSC-A). Cells were then passed through two singlet gates  
539 using the width and height metrics of the **(b)** side scatter (SSC-H versus SSC-W) and **(c)**  
540 forward scatter (FSC-H versus FSC-W). **(d)** SOX2+, and SOX2-, and intermediate  
541 progenitor (IPC) populations were isolated by gating on EOMES-PE-Cy7 and SOX2-  
542 PerCP-Cy5.5 staining. **(e)** Radial glia (RG) and interneurons (iNs) were isolated as high

543 PAX6/high SOX2 and medium SOX2/low PAX6 populations, respectively. (f) Excitatory  
544 neurons (eNs) were isolated from the SOX2- population by gating on SATB2-Alexa Fluor  
545 647 staining.

546

547 **Supplementary Figure 2. Reproducibility between replicates for RNA-seq, ATAC-**  
548 **seq, and PLAC-seq.**

549

550 (a) RNA-seq replicates were hierarchically clustered according to gene expression  
551 sample distances using DESeq2. (b) Heatmap with pairwise correlations and hierarchical  
552 clustering for read densities at the set of unified open chromatin regions for ATAC-seq  
553 replicates. (c) Principle component analysis (PCA) was performed based on the  
554 normalized contact frequencies across all PLAC-seq replicates (see methods). To assess  
555 the robustness of the results, we conducted the analysis separately for bin pairs within  
556 300 and 600 kb interacting windows.

557

558 **Supplementary Figure 3. Identification of chromatin interactions using MAPS.**

559

560 (a) Illustration of AND and XOR sets in a representative PLAC-seq contact matrix. The  
561 blue tracks represent 1D H3K4me3 peaks at bin positions 4, 8, 12, and 14. The black  
562 cells represent interactions within the same bin. The purple cells represent interactions in  
563 the AND set where both of the interacting bins contain 1D H3K4me3 peaks. The orange  
564 cells represent interactions in the XOR set where only one of the interacting bins contains  
565 1D H3K4me3 peaks. The grey cells represent interactions where neither of the interacting  
566 bins contains 1D H3K4me3 peaks. (b) Venn diagram displaying cell type-specificity of  
567 MAPS interactions for each cell type. (c) Proportions of MAPS interactions occurring  
568 within and across TADs in GZ and CP tissues for each cell type.

569

570 **Supplementary Figure 4. Contribution of 3D epigenomic landscapes to gene**  
571 **regulation.**

572

573 (a) GO enrichment analysis for genes whose promoters participate in cell type-specific  
574 interactions. The top annotation clusters from DAVID are reported along with their  
575 enrichment scores for each cell type. (b) Scatterplots showing positive correlation  
576 between the difference in the number of MAPS interactions at each promoter and the  
577 difference in expression of the corresponding genes between all pairs of cell types  
578 (Pearson product-moment correlation coefficient, two-sided t-test,  $P < 2.2 \times 10^{-16}$  for all cell  
579 types). Fitted trendlines based on linear regression are also shown. (c) Fold enrichment  
580 of open chromatin regions over distance-matched background regions in 1 Mb windows  
581 around distal interacting regions for MAPS interactions in IPCs, eNs, and iNs.

582

583 **Supplementary Figure 5. Correlations between chromatin interactions and gene**  
584 **expression for cell-type specific and shared genes.**

585

586 (a) Scatterplots showing the correlation between numbers of MAPS interactions and gene  
587 expression at promoters in each cell type. (b) Cumulative distribution function (CDF) plots  
588 showing the numbers of MAPS interactions for shared versus cell type-specific genes in  
589 RG, IPCs, and iNs (two sample t-test, two-sided,  $P = 5.91 \times 10^{-22}$ ,  $3.74 \times 10^{-11}$ , and  $2.94 \times 10^{-19}$   
590 for RG, IPCs, and iNs, respectively).

591

592 **Supplementary Figure 6. Specific families of transposable elements are implicated**  
593 **in SIP formation.**

594

595 (a-c) Enrichment of TEs in SIPGs at the class (a), family (b), and subfamily (c) levels for  
596 each cell type. Only families occupying more than 1% of the genome are shown in (b).  
597 Only subfamilies from the MIR and ERVL-MaLR families occupying more than 0.1% of  
598 the genome are shown in (c). (d) Bar graph shows elevated *ADRA2A* gene expression in  
599 eNs. (e) Illustration of the 12 distal interacting regions in the *ADRA2A* SIPG containing at  
600 least one ERVL-MaLR-derived ZNF143 motif. ZNF143 motifs are indicated and colored  
601 by strand. The bin identifier corresponds to the labels in Fig. 3j. (f) Illustration of the  
602 conservation of ZNF143 binding motifs in ERVL-MaLR TEs. Blue bars indicate consensus  
603 sequences, yellow bars indicate individual copies of ERVL-MaLR TEs in the *ADRA2A*

604 SIPG, and red bars indicate ZNF143 motifs. The positions of the ZNF143 motifs relative  
605 to the ERVL-MaLR TE sequences was determined using FIMO.

606

607 **Supplementary Figure 7. Developmental trajectories and annotations for complex**  
608 **neuropsychiatric disorder- and trait-associated variants.**

609

610 (a) Box plots showing the distributions of gene expression and cumulative interaction  
611 scores for groups in **Fig. 4**. The median, upper and lower quartiles, minimum, and  
612 maximum are indicated. (b) Bar graphs showing the numbers of GWAS SNPs ( $P < 10^{-8}$ )  
613 interacting with their nearest gene only, with both their nearest and distal genes, or with  
614 distal genes only for each cell type and neuropsychiatric trait. Venn diagrams display the  
615 cell type-specificity of all interacting GWAS SNPs for each neuropsychiatric trait.

616

617 **Supplementary Table 1. Sample metadata.**

618

619 **Supplementary Table 2. PLAC-seq, ATAC-seq, and RNA-seq data processing**  
620 **metrics.**

621

622 **Supplementary Table 3. Enriched GO terms for genes participating in cell type-**  
623 **specific interactions.**

624

625 **Supplementary Table 4. Motif enrichment at cell type-specific distal interacting**  
626 **regions.**

627

628 **Supplementary Table 5. Super interactive promoters for each cell type.**

629

630 **Supplementary Table 6. Enriched GO terms for genes associated with specific**  
631 **developmental trajectories.**

632

633 **Supplementary Table 7. Target gene annotation for enhancers overlapping**  
634 **chromatin interactions.**

635

636 **Supplementary Table 8. Target gene annotation for complex neuropsychiatric**  
637 **disorder- and trait-associated GWAS SNPs overlapping chromatin interactions.**

638

639 **Supplementary Table 9. sgRNA sequences used for functional validation.**

640

641 **Methods**

642

643 **Ethics statement**

644

645 Deidentified embryonic brain tissue samples were collected with prior patient consent in  
646 strict observance of legal and institutional ethical regulations. All protocols were approved  
647 by the Human Gamete, Embryo, and Stem Cell Research Committee (GESCR) and  
648 Institutional Review Board at the University of California, San Francisco.

649

650 **Tissue dissociation**

651

652 The tissue dissociation protocol was adapted from Nowakowski et al, 2017<sup>1</sup>. Briefly,  
653 samples were cut into small pieces in artificial cerebrospinal fluid before being added into  
654 pre-warmed papain dissociation media (Worthington #LK003150). The dissociation  
655 solution was incubated for 45 minutes at 37°C. Excess solution was removed and  
656 replaced with cell culture media. The pieces of tissue were triturated, filtered through a  
657 70 µM nylon mesh, and centrifuged at 300 g for 8 minutes. The supernatant was removed  
658 and replaced with fresh culture media.

659

660 **Sample fixation**

661

662 Mid-gestational human brain samples between GW15 and GW22 were fixed in 2%  
663 paraformaldehyde prepared in PBS with gentle agitation for 10 minutes at room  
664 temperature. Glycine was added to a final concentration of 200 mM to quench the

665 reactions, and the samples were centrifuged at 500 g for 5 minutes at 4°C. The samples  
666 were washed twice with PBS before being frozen at -80°C until further processing.

667

## 668 **Permeabilization and staining**

669

670 The cell pellet was thawed on ice and resuspended in PBS with 0.1% Triton-X-100 for 15  
671 minutes. The cells were then washed twice with PBS and resuspended in 5% BSA in PBS  
672 for staining. Staining proceeded for at least one hour with FcR Blocking Reagent (Miltenyi  
673 Biotech, 1/20 dilution), EOMES-PE-Cy7 (Invitrogen, WD1928, 1/10 dilution), PAX6-PE  
674 (BD Biosciences, O18-1330, 1/10 dilution), SOX2-PerCP-Cy5.5 (BD Biosciences, O38-  
675 678, 1/10 dilution), and SATB2-Alexa Fluor 647 (Abcam, EPNCIR130A, 1/100 dilution).  
676 Following staining, the cells were centrifuged at 500 g for 5 minutes. The supernatant was  
677 removed, and the pellet was diluted into PBS. When sorting cells for RNA-seq libraries,  
678 1% RNasin Plus RNase Inhibitor (Promega) was included in all buffers, PBS was  
679 prepared from RNase-free stocks, and acetylated RNase-free BSA was used to prepare  
680 5% BSA in PBS for staining.

681

## 682 **FACS**

683

684 AbC Total Antibody Compensation Beads (Thermo Fisher) were used to generate single  
685 color compensation controls prior to sorting. Sorting was conducted on either the  
686 FACSAria II, FACSAria IIu, or FACSAria Fusion instruments using a 70 µM nozzle, and  
687 cells were collected in 5 ml tubes pre-coated with FBS. A sample of each sorted  
688 population was reanalyzed on the same machine to assess purity. The cells were  
689 collected by centrifuging at 500 g for 10 minutes. The supernatant was removed, and the  
690 pellet was frozen at -80°C until further processing. When sorting cells for RNA-seq  
691 libraries, collection tubes were coated with both FBS and RNAlater (Thermo Fisher)

692

## 693 **Primary cell culture**

694

695 Following dissociation, cells were plated onto Matrigel-coated coverslips in 48 well plates

696 at a density of approximately  $0.7 \times 10^6$  cells per well. The cells were infected with lentivirus  
697 24 hours after plating, and media was changed every two days. Media was composed of  
698 96% DMEM/F-12 with GlutaMAX, 1% N-2, 1% B-27, and 1% penicillin/streptomycin. The  
699 cells were grown in 8% oxygen and 5% carbon dioxide, and they were harvested for  
700 fixation four days post-infection.

701

## 702 **PLAC-seq**

703

704 PLAC-seq was performed according to the protocol from Fang et al., 2016<sup>43</sup>. 1 to 5 million  
705 cells were used to prepare each library. Digestion was performed using 100 U Mbol for 2  
706 hours at 37°C, and chromatin immunoprecipitation was performed using Dynabeads M-  
707 280 sheep anti-rabbit IgG (Invitrogen #11203D) mixed with 5 µg anti-H3K4me3 antibody  
708 (Millipore 04-745). TruSeq sequencing adapters were added during PCR amplification.  
709 Libraries were sent for paired-end sequencing on the HiSeq X Ten or NovoSeq 6000  
710 instruments (150 bp paired-end reads). fastp was applied to trim reads to 100 bp, and  
711 replicates were merged and downsampled to normalize the number of usable reads  
712 before processing with MAPS.

713

## 714 **MAPS interaction calling**

715

716 We used the MAPS pipeline to call significant long-range chromatin interactions from our  
717 PLAC-seq datasets. First, bwa mem was used to map raw reads to hg38. Unmapped  
718 reads and reads with low mapping quality were discarded, and the resulting filtered read  
719 pairs were processed as previously reported<sup>13</sup>. Briefly, we divided the genome into 5 kb  
720 bins and counted the number of read pairs representing interactions between 5 kb bins.  
721 To define our 3D anchor bins, we took the union of peaks called using MACS2 from read  
722 pairs with interaction distances < 1 kb for each cell type (1D H3K4me3 peaks). Based on  
723 this annotation, we classified interactions into AND, XOR, and NOT sets based on  
724 whether both, only one, or none of the interacting 5 kb bins overlapped 1D H3K4me3  
725 peaks (**Supplementary Fig. 3a**). Since we were interested in identifying significant  
726 H3K4me3-mediated chromatin interactions, we retained only interactions in the AND and



727 XOR sets for downstream processing. We also retained only intrachromosomal  
728 interactions with interaction distances between 10 kb and 1 Mb. These two criteria  
729 constituted our definition of usable reads.

730

731 For calling interactions, we applied a Poisson regression-based approach to normalize  
732 systematic biases from restriction sites, GC content, sequence repetitiveness, and ChIP  
733 enrichment. We fitted models for interactions in the AND and XOR sets separately and  
734 calculated false discovery rates (FDRs) for interactions based on their expected and  
735 observed contact frequencies between 5 kb bin pairs. Furthermore, we grouped  
736 interactions that were located within 15 kb of each other at both ends into clusters and  
737 classified all other interactions as singletons. To define our sets of significant long-range  
738 chromatin interactions, we retained only interactions with 12 or more reads, normalized  
739 contact frequencies (defined as the ratio between the observed and expected contact  
740 frequencies)  $\geq 2$ , and FDR  $< 0.01$  for clusters and FDR  $< 0.0001$  for singletons. This was  
741 based on the reasoning that more biologically meaningful interactions are likely to appear  
742 in clusters, and singletons are more likely to present false positives.

743

#### 744 **MAPS reproducibility analysis**

745

746 PCA plots were generated based on the normalized contact frequencies for 5 kb bin pairs  
747 from our PLAC-seq datasets. Specifically, we first extracted AND and XOR 5 kb bin pairs  
748 based on cell type-specific 1D H3K4me3 peaks for each of the 11 replicates. We next  
749 applied zero-truncated Poisson regression, adjusting for the same systematic biases as  
750 the MAPS pipeline. Again, we derived normalized contact frequencies based on the ratio  
751 between the observed and expected contact frequencies between 5 kb bin pairs, with the  
752 expected contact frequencies being the fitted values from the zero-truncated Poisson  
753 regression. Normalized contact frequencies were then log-transformed and merged  
754 across the 11 replicates. This quantile normalized merged data was used to generate the  
755 PCA plots. We restricted our analysis to 5 kb bin pairs within 300 kb or 600 kb windows  
756 for **Supplementary Fig. 2c**.

757

## 758 **ATAC-seq**

759

760 ATAC-seq was performed as previously described using the Nextera DNA Library Prep  
761 Kit (Illumina #FC-121-1030). First, fixed cells were washed once with ice cold PBS  
762 containing 1x protease inhibitor before being resuspended in ice cold nuclei extraction  
763 buffer (10 mM Tris-HCl pH 7.5, 10 mM NaCl, 3 mM MgCl<sub>2</sub>, 0.1% Igepal CA630, and 1x  
764 protease inhibitor) for 5 minutes. Next, 50,000 cells were counted out, exchanged into 50  
765  $\mu$ L 1x Buffer TD, then incubated with 2.5  $\mu$ L TDE1 enzyme for 45 minutes at 37°C with  
766 shaking. Following transposition, 150  $\mu$ L reverse crosslinking solution (50  $\mu$ L 1 M Tris pH  
767 8.0, 100  $\mu$ L 10% SDS, 2  $\mu$ L 0.5 M EDTA, 10  $\mu$ L 5 M NaCl, 800  $\mu$ L water, and 2.5  $\mu$ L 20  
768 mg/mL Proteinase K) was added to each reaction, and the reactions were incubated at  
769 65°C overnight. On the next day, DNA was purified using Qiagen MinElute spin columns,  
770 amplified using Nextera primers, then size-selected for fragments between 300 and 1000  
771 bp using AMPure XP beads. Libraries were sent for paired-end sequencing on the  
772 NovaSeq 6000 instrument (150 bp paired-end reads). Raw reads were mapped to hg38  
773 and processed using the ENCODE pipeline  
774 ([https://github.com/kundajelab/atac\\_dnase\\_pipelines](https://github.com/kundajelab/atac_dnase_pipelines)) running the default settings. All  
775 sequencing reads were trimmed to 50 bp prior to mapping. The sets of optimal naive  
776 overlap peaks for each cell type were used for further downstream analysis.

777

## 778 **RNA-seq**

779

780 We extracted total RNA from the sorted cell populations using the RNASTORM™ FFPE  
781 RNA extraction kit (Cell Data Sciences #CD501) starting from  $5 \times 10^5$  to  $1.5 \times 10^6$  cells. The  
782 quality of the extracted RNA was checked by calculating the percentage of RNA  
783 fragments with size > 200 bp (DV200) from the Agilent 2100 Bioanalyzer. RNA samples  
784 with DV200  $\geq$  40% were used for library construction. First, they were depleted of  
785 ribosomal RNA using the KAPA RNA HyperPrep Kit with RiboErase (HMR #KK8560).  
786 Next, the RNA was used for first and second strand synthesis, dA-tailing, and sequencing  
787 adapter ligation. The cDNA was cleaned up and TruSeq sequencing adapters were added

788 via PCR amplification. Libraries were sent for paired-end sequencing on the NovaSeq  
789 6000 instrument (150 bp paired-end reads). Raw reads were aligned to hg38 using STAR  
790 running the standard ENCODE parameters, and transcript quantification was performed  
791 in a strand-specific manner using RSEM with the GENCODE 29 annotation. The edgeR  
792 package in R was used to calculate TMM-normalized RPKM values for each gene based  
793 on the expected counts and gene lengths for each replicate as reported by RSEM. The  
794 mean gene expression across all replicates for each cell type was used for further  
795 downstream analysis.

796

### 797 **TF motif enrichment analysis**

798

799 We took the set of open chromatin regions participating in cell type-specific XOR  
800 interactions for each cell type and used the sequences in 200 bp windows around the  
801 peak summits to perform motif enrichment analysis using HOMER running the default  
802 settings. The complete set of vertebrate motifs from the JASPAR database were used for  
803 detection. The “-float” option was specified to optimize the detection threshold, and the  
804 entire genome was used as a background. Entries with similar or identical consensus TF  
805 motif sequences were grouped for brevity.

806

### 807 **GO enrichment analysis**

808

809 Protein coding and noncoding RNA genes from GENCODE 29 participating in cell type-  
810 specific XOR interactions were used for GO enrichment analysis. Only genes participating  
811 in interactions with promoter open chromatin regions on one end and distal open  
812 chromatin regions on the other end were used. A minimum normalized RPKM of 0.5 was  
813 used to filter out genes that were not significantly expressed the corresponding cell types,  
814 and the resulting gene lists were input into DAVID 6.8 running functional annotation  
815 clustering with the default settings and the “GOTERM\_BP\_ALL” ontology.

816

### 817 **SIP identification**

818

819 We devised an approach similar to calling super-enhancers<sup>44</sup> to identify super interactive  
820 promoters (SIPs) using our MAPS interactions for each cell type. Specifically, we started  
821 from 18,373 anchor bins containing 1D H3K4me3 peaks annotated in at least one of the  
822 sorted cell populations. For each anchor bin, we calculated the cumulative interaction  
823 score for all its coincident MAPS interactions. For anchor bins without any MAPS  
824 interactions, the cumulative interaction score was calculated to be zero. We then  
825 prepared plots of the ranked cumulative interaction scores for anchor bins in each cell  
826 type and defined SIPs as promoters located to the right of the knee of each curve.

827

### 828 **Defining cell type-specific versus shared genes**

829

830 We classified each gene as cell type-specific or shared according to its Shannon entropy  
831 across all four cell types. Specifically, we first calculated the relative expression of each  
832 gene in each cell type, defined as a gene's normalized RPKM in the cell type divided by  
833 the sum of the gene's normalized RPKMs across all four cell types. Next, we calculated  
834 the Shannon entropy based the gene's relative expression in each of the cell types. A cell  
835 type-specific gene is characterized by low entropy, while a shared gene is characterized  
836 by high entropy. We classified a gene as cell type-specific if met the following conditions:  
837 its entropy was  $< 0.01$ , its normalized RPKM was  $> 1$  in that cell type, and its normalized  
838 RPKM was highest in that cell type among all four cell types. All other genes with  
839 normalized RPKM  $> 1$  across every cell type were classified as shared.

840

### 841 **TE family and subfamily enrichment in SIPGs**

842

843 A SIP and its distal interacting regions are considered to be a SIP group or SIPG. TE  
844 enrichment in SIPGs was evaluated as follows. The foreground enrichment was defined  
845 as the number of copies of TEs from a given family or subfamily overlapping SIPGs in  
846 each cell type. The background enrichment was defined as the number of copies of TEs  
847 overlapping all interacting 5 kb bins. The overall enrichment was defined as the  
848 foreground enrichment divided by the background enrichment multiplied by the fraction

849 of interacting 5 kb bins belonging to SIPGs. At least 50% of a TE had to intersect a 5 kb  
850 bin for it to be considered to overlap the 5 kb bin.

851

### 852 **ERVL-MaLR TEs enrichment in specific SIPGs**

853

854 For each SIPG, the foreground enrichment was defined as the number of distal interacting  
855 regions with one or more copies of an ERVL-MaLR TE. The background enrichment was  
856 calculated by randomly permuting the locations of the distal interacting regions and  
857 counting the number of permuted regions with one or more copies of an ERVL-MaLR TE.  
858 This was performed over 100 such permutations. The overall enrichment was defined as  
859 the foreground enrichment divided by the background enrichment. The one-tailed P-value  
860 for each SIPG was calculated using the hypergeometric distribution as follows:  $P =$   
861  $\text{choose}(m, q) \times \text{choose}(n, k - q) / \text{choose}(m + n, k)$ , where “q” is the number of 5 kb bins  
862 within the SIPG with one or more copies of an ERVL-MaLR TE, “m” is the number of 5 kb  
863 bins with one or more copies of an ERVL-MaLR TE on the same chromosome, “n” is the  
864 number of 5 kb bins with no copies of an ERVL-MaLR TE on the same chromosome, and  
865 “k” is the size of the SIPG.

866

### 867 **ZNF143 motif enrichment at ERVL-MaLR TEs in specific SIPGs**

868

869 For each SIPG, the foreground enrichment was defined as the number of ZNF143 motifs  
870 occurring in ERVL-MaLR TEs as determined using FIMO in distal interacting regions for  
871 the SIPG. The background enrichment was defined as the number of ZNF143 motifs  
872 occurring in the SIPG, but not necessarily in the ERVL-MaLR-TEs. The overall  
873 enrichment was defined as the foreground enrichment divided by the background  
874 enrichment multiplied by fraction of the SIPG sequence occupied by ERVL-MaLR TEs.  
875 The one-tailed P-value was calculated using the Poisson distribution as follows: the  
876 number of events is the foreground enrichment, and the probability is the background  
877 enrichment multiplied by fraction of the SIPG sequence occupied by ERVL-MaLR TEs.

878

879 **Target gene annotation for enhancers and complex neuropsychiatric disorder- and**  
880 **trait-associated variants**

881

882 To determine whether a human gained enhancer, Vista enhancer element, or GWAS SNP  
883 potentially interacted with a target gene, we determined whether any of its promoters  
884 participated in MAPS interactions with the feature of interest on the other end. All human  
885 gained enhancers and Vista enhancer elements were expanded to a width of 5 kb and all  
886 GWAS SNPs were expanded to a width of 1 kb to account for potential functional  
887 sequences around each feature. Furthermore, we determined the proportion of GWAS  
888 SNPs interacting with their nearest and/or distal genes, except when the promoters for  
889 the nearest gene and GWAS SNP fell within the same 5 kb bin and could not be resolved  
890 for MAPS interactions (“same fragment ambiguity”). We provide target gene annotations  
891 for human gained enhancers and Vista enhancer elements in **Supplementary Table 7**  
892 and GWAS SNPs in **Supplementary Table 8**. The overlap of each feature with open  
893 chromatin regions in each cell type is also reported.

894

895 **Partitioning heritability for complex neuropsychiatric disorder- and trait-**  
896 **associated variants**

897

898 We employed stratified LD score regression<sup>34,35</sup> to partition SNP heritability for  
899 neuropsychiatric traits using our cell type-specific 3D epigenomic annotations.  
900 Specifically, we first collected GWAS summary statistics for seven complex  
901 neuropsychiatric disorders and traits including Alzheimer’s disease (AD), attention deficit  
902 hyperactivity disorder (ADHD), autism spectrum disorder (ASD), bipolar disorder (BD),  
903 intelligence quotient (IQ), major depressive disorder (MDD), and schizophrenia  
904 (SCZ). We estimated the enrichment of SNP heritability for each complex  
905 neuropsychiatric disorder and trait separately based on 3D anchor or target bins from  
906 MAPS interactions for each cell type. 3D anchor bins contain H3K4me3 ChIP-seq peaks  
907 and are presumably enriched for active promoters, whereas 3D target bins are  
908 presumably enriched for distal regulatory elements such as enhancers.

909

## 910 **Validation of distal interacting regions using CRISPRview**

911

912 The CRISPRi vector was modified from the Mosaic-seq<sup>45</sup> and CROP-seq vectors<sup>46</sup>. The  
913 hU6-sgRNA expression cassette from the CROPseq-Guide-Puro vector (Addgene  
914 #86708) was cloned and inserted downstream of the WPRE element in the Lenti-dCas9-  
915 KRAB-blast vector (Addgene #89567). The blasticidin resistance gene was replaced with  
916 either mCherry or EGFP. sgRNAs targeting open chromatin regions in distal interaction  
917 regions were designed using CHOPCHOP. Single stranded DNA was annealed and  
918 ligated into the CRISPRi vector at the BsmBI cutting locus. Single clones were picked  
919 following transformation, and the sgRNA sequences were confirmed by Sanger  
920 sequencing. For lentiviral packaging, the CRISPRi vector, pMD2.G (Addgene #12259),  
921 and psPAX (Addgene #12260) were transformed into 293T cells using PolyJet (SigmaGen  
922 Laboratories #SL100688) according to the manufacturer's instructions. Virus-containing  
923 media was collected three times every 16 to 20 hours and concentrated using Amicon  
924 10K columns. Collected lentivirus was stored immediately at -80°C. Primary cell cultures  
925 were infected with virus (MOI < 1) 24 hours after plating, and four days after infection,  
926 cells were harvested and fixed with 4% PFA for FISH and immunostaining.

927

928 FISH experiments detecting nascent transcripts were performed using the RNAScope  
929 Multiplex Fluorescent V2 Assay kit (ACDBio #323100) followed by immunostaining for  
930 cell type-specific markers. Probes targeting intronic regions for *GPX3* (ACDBio #572341),  
931 *TNC* (ACDBio #572361), and *HES1* (ACDBio #560881) were custom-designed,  
932 synthesized, and labeled with TSA Cyanine 5 (Perkin Elmer #NEL705A001KT, 1:1000  
933 dilution). Next, fixed cells were pretreated with hydrogen peroxide for 10 minutes and  
934 Protease III for 15 minutes, and probes were hybridized and amplified according to the  
935 manufacturer's instructions. Slides were washed with PBS before blocking with 5%  
936 donkey serum in PBS for 30 minutes at room temperature. Next, slides were incubated  
937 with primary antibodies against mCherry (Abcam ab205402), GFP (Abcam ab1218) and  
938 GFAP (Abcam ab7260) overnight at 4°C, followed by incubation with Alexa Fluor 488  
939 donkey anti-mouse IgG (Thermo Fisher Scientific #A21202), Alexa-546 nm donkey anti-  
940 rabbit IgG (Thermo Fisher Scientific #A10040), or Alexa-594 nm goat anti-chicken IgG



941 (Thermo Fisher Scientific #A11042) for 1 hour at room temperature. Three-dimensional  
942 confocal microscopy images were captured using a Leica TCS SP8 with a 40x oil-  
943 immersion objective lens (NA = 1.30). The z-step size was 0.4  $\mu\text{m}$ . For five color  
944 multiplexed imaging, three sequential scans were performed to avoid overlapping  
945 spectra. The first excitation lasers were 405 nm and 594 nm, the second excitation lasers  
946 were 488 nm and 633 nm, and the third excitation laser was 561 nm. All images were  
947 obtained using the same acquisition settings. For FISH analysis, we developed an  
948 integrated Python-based pipeline called Single-Molecule Automatic RNA Transcription  
949 Quantification (SMART-Q) for quantifying nascent transcripts in single cells. Briefly,  
950 RNAscope signal was filtered then fitted in three dimensions using Gaussian models.  
951 Next, segmentation was performed on the DAPI channel in two dimensions to ascertain  
952 the location of each nucleus. Finally, segmentation was performed on the cell marker  
953 channel to identify RG-specific nuclei, and the positional RNAscope data was integrated  
954 with the segmentation results to determine the final quantification of nascent transcripts  
955 in each cell.

956

## 957 **References**

958

- 959 1 Nowakowski, T. J. *et al.* Spatiotemporal gene expression trajectories reveal developmental  
960 hierarchies of the human cortex. *Science* **358**, 1318-1323, doi:10.1126/science.aap8809  
961 (2017).
- 962 2 Zhong, S. *et al.* A single-cell RNA-seq survey of the developmental landscape of the  
963 human prefrontal cortex. *Nature* **555**, 524-528, doi:10.1038/nature25980 (2018).
- 964 3 Hansen, D. V., Lui, J. H., Parker, P. R. & Kriegstein, A. R. Neurogenic radial glia in the  
965 outer subventricular zone of human neocortex. *Nature* **464**, 554-561,  
966 doi:10.1038/nature08845 (2010).
- 967 4 Pontious, A., Kowalczyk, T., Englund, C. & Hevner, R. F. Role of intermediate progenitor  
968 cells in cerebral cortex development. *Dev Neurosci* **30**, 24-32, doi:10.1159/000109848  
969 (2008).
- 970 5 Wu, Q. *et al.* The dynamics of neuronal migration. *Adv Exp Med Biol* **800**, 25-36,  
971 doi:10.1007/978-94-007-7687-6\_2 (2014).
- 972 6 Anderson, S., Mione, M., Yun, K. & Rubenstein, J. L. Differential origins of neocortical  
973 projection and local circuit neurons: role of *Dlx* genes in neocortical interneuronogenesis.  
974 *Cereb Cortex* **9**, 646-654, doi:10.1093/cercor/9.6.646 (1999).
- 975 7 Zheng, H. & Xie, W. The role of 3D genome organization in development and cell  
976 differentiation. *Nat Rev Mol Cell Biol* **20**, 535-550, doi:10.1038/s41580-019-0132-4  
977 (2019).
- 978 8 Li, Y., Hu, M. & Shen, Y. Gene regulation in the 3D genome. *Hum Mol Genet* **27**, R228-  
979 R233, doi:10.1093/hmg/ddy164 (2018).

- 980 9 Schoenfelder, S. & Fraser, P. Long-range enhancer-promoter contacts in gene expression  
981 control. *Nat Rev Genet* **20**, 437-455, doi:10.1038/s41576-019-0128-0 (2019).
- 982 10 Won, H. *et al.* Chromosome conformation elucidates regulatory relationships in  
983 developing human brain. *Nature* **538**, 523-527, doi:10.1038/nature19847 (2016).
- 984 11 Roadmap Epigenomics, C. *et al.* Integrative analysis of 111 reference human epigenomes.  
985 *Nature* **518**, 317-330, doi:10.1038/nature14248 (2015).
- 986 12 Thomsen, E. R. *et al.* Fixed single-cell transcriptomic characterization of human radial glial  
987 diversity. *Nat Methods* **13**, 87-93, doi:10.1038/nmeth.3629 (2016).
- 988 13 Juric, I. *et al.* MAPS: Model-based analysis of long-range chromatin interactions from  
989 PLAC-seq and HiChIP experiments. *PLoS Comput Biol* **15**, e1006982,  
990 doi:10.1371/journal.pcbi.1006982 (2019).
- 991 14 Heinz, S. *et al.* Simple combinations of lineage-determining transcription factors prime  
992 cis-regulatory elements required for macrophage and B cell identities. *Mol Cell* **38**, 576-  
993 589, doi:10.1016/j.molcel.2010.05.004 (2010).
- 994 15 Englund, C. *et al.* Pax6, Tbr2, and Tbr1 are expressed sequentially by radial glia,  
995 intermediate progenitor cells, and postmitotic neurons in developing neocortex. *J Neurosci*  
996 **25**, 247-251, doi:10.1523/JNEUROSCI.2899-04.2005 (2005).
- 997 16 La Manno, G. *et al.* Molecular Diversity of Midbrain Development in Mouse, Human, and  
998 Stem Cells. *Cell* **167**, 566-580 e519, doi:10.1016/j.cell.2016.09.027 (2016).
- 999 17 Neves, G. *et al.* The LIM homeodomain protein Lhx6 regulates maturation of interneurons  
1000 and network excitability in the mammalian cortex. *Cereb Cortex* **23**, 1811-1823,  
1001 doi:10.1093/cercor/bhs159 (2013).
- 1002 18 Wang, B. *et al.* Loss of Gsx1 and Gsx2 function rescues distinct phenotypes in Dlx1/2  
1003 mutants. *J Comp Neurol* **521**, 1561-1584, doi:10.1002/cne.23242 (2013).
- 1004 19 Wang, Y. *et al.* Dlx5 and Dlx6 regulate the development of parvalbumin-expressing  
1005 cortical interneurons. *J Neurosci* **30**, 5334-5345, doi:10.1523/JNEUROSCI.5963-09.2010  
1006 (2010).
- 1007 20 Liu, S. J. *et al.* Single-cell analysis of long non-coding RNAs in the developing human  
1008 neocortex. *Genome Biol* **17**, 67, doi:10.1186/s13059-016-0932-1 (2016).
- 1009 21 Javierre, B. M. *et al.* Lineage-Specific Genome Architecture Links Enhancers and Non-  
1010 coding Disease Variants to Target Gene Promoters. *Cell* **167**, 1369-1384 e1319,  
1011 doi:10.1016/j.cell.2016.09.037 (2016).
- 1012 22 Feschotte, C. Transposable elements and the evolution of regulatory networks. *Nat Rev*  
1013 *Genet* **9**, 397-405, doi:10.1038/nrg2337 (2008).
- 1014 23 Zhang, Y. *et al.* Transcriptionally active HERV-H retrotransposons demarcate  
1015 topologically associating domains in human pluripotent stem cells. *Nat Genet*,  
1016 doi:10.1038/s41588-019-0479-7 (2019).
- 1017 24 Choudhary, M. N. K. *et al.* Co-opted transposons help perpetuate conserved higher-order  
1018 chromosomal structures. *bioRxiv*, doi:<https://doi.org/10.1101/485342> (2018).
- 1019 25 Bailey, S. D. *et al.* ZNF143 provides sequence specificity to secure chromatin interactions  
1020 at gene promoters. *Nat Commun* **2**, 6186, doi:10.1038/ncomms7186 (2015).
- 1021 26 Ngondo-Mbongo, R. P., Myslinski, E., Aster, J. C. & Carbon, P. Modulation of gene  
1022 expression via overlapping binding sites exerted by ZNF143, Notch1 and THAP11.  
1023 *Nucleic Acids Res* **41**, 4000-4014, doi:10.1093/nar/gkt088 (2013).

- 1024 27 Sundaram, V. & Wang, T. Transposable Element Mediated Innovation in Gene Regulatory  
1025 Landscapes of Cells: Re-Visiting the "Gene-Battery" Model. *Bioessays* **40**,  
1026 doi:10.1002/bies.201700155 (2018).
- 1027 28 Miller, D. J., Bhaduri, A., Sestan, N. & Kriegstein, A. Shared and derived features of  
1028 cellular diversity in the human cerebral cortex. *Curr Opin Neurobiol* **56**, 117-124,  
1029 doi:10.1016/j.conb.2018.12.005 (2019).
- 1030 29 Suzuki, I. K. *et al.* Human-Specific NOTCH2NL Genes Expand Cortical Neurogenesis  
1031 through Delta/Notch Regulation. *Cell* **173**, 1370-1384 e1316,  
1032 doi:10.1016/j.cell.2018.03.067 (2018).
- 1033 30 Rani, N. *et al.* A Primate lncRNA Mediates Notch Signaling during Neuronal Development  
1034 by Sequestering miRNA. *Neuron* **90**, 1174-1188, doi:10.1016/j.neuron.2016.05.005  
1035 (2016).
- 1036 31 Carbon, S. *et al.* AmiGO: online access to ontology and annotation data. *Bioinformatics*  
1037 **25**, 288-289, doi:10.1093/bioinformatics/btn615 (2009).
- 1038 32 Reilly, S. K. *et al.* Evolutionary genomics. Evolutionary changes in promoter and enhancer  
1039 activity during human corticogenesis. *Science* **347**, 1155-1159,  
1040 doi:10.1126/science.1260943 (2015).
- 1041 33 Visel, A., Minovitsky, S., Dubchak, I. & Pennacchio, L. A. VISTA Enhancer Browser--a  
1042 database of tissue-specific human enhancers. *Nucleic Acids Res* **35**, D88-92,  
1043 doi:10.1093/nar/gkl822 (2007).
- 1044 34 Bulik-Sullivan, B. K. *et al.* LD Score regression distinguishes confounding from  
1045 polygenicity in genome-wide association studies. *Nat Genet* **47**, 291-295,  
1046 doi:10.1038/ng.3211 (2015).
- 1047 35 Finucane, H. K. *et al.* Partitioning heritability by functional annotation using genome-wide  
1048 association summary statistics. *Nat Genet* **47**, 1228-1235, doi:10.1038/ng.3404 (2015).
- 1049 36 Demontis, D. *et al.* Discovery of the first genome-wide significant risk loci for attention  
1050 deficit/hyperactivity disorder. *Nat Genet* **51**, 63-75, doi:10.1038/s41588-018-0269-7  
1051 (2019).
- 1052 37 Grove, J. *et al.* Identification of common genetic risk variants for autism spectrum disorder.  
1053 *Nat Genet* **51**, 431-444, doi:10.1038/s41588-019-0344-8 (2019).
- 1054 38 Stahl, E. A. *et al.* Genome-wide association study identifies 30 loci associated with bipolar  
1055 disorder. *Nat Genet* **51**, 793-803, doi:10.1038/s41588-019-0397-8 (2019).
- 1056 39 Savage, J. E. *et al.* Genome-wide association meta-analysis in 269,867 individuals  
1057 identifies new genetic and functional links to intelligence. *Nat Genet* **50**, 912-919,  
1058 doi:10.1038/s41588-018-0152-6 (2018).
- 1059 40 Howard, D. M. *et al.* Genome-wide meta-analysis of depression identifies 102 independent  
1060 variants and highlights the importance of the prefrontal brain regions. *Nat Neurosci* **22**,  
1061 343-352, doi:10.1038/s41593-018-0326-7 (2019).
- 1062 41 Pardinás, A. F. *et al.* Common schizophrenia alleles are enriched in mutation-intolerant  
1063 genes and in regions under strong background selection. *Nat Genet* **50**, 381-389,  
1064 doi:10.1038/s41588-018-0059-2 (2018).
- 1065 42 Song, M. *et al.* Mapping cis-regulatory chromatin contacts in neural cells links  
1066 neuropsychiatric disorder risk variants to target genes. *Nat Genet* **51**, 1252-1262,  
1067 doi:10.1038/s41588-019-0472-1 (2019).
- 1068 43 Fang, R. *et al.* Mapping of long-range chromatin interactions by proximity ligation-assisted  
1069 ChIP-seq. *Cell Res* **26**, 1345-1348, doi:10.1038/cr.2016.137 (2016).

- 1070 44 Hnisz, D. *et al.* Super-enhancers in the control of cell identity and disease. *Cell* **155**, 934-  
1071 947, doi:10.1016/j.cell.2013.09.053 (2013).
- 1072 45 Xie, S., Duan, J., Li, B., Zhou, P. & Hon, G. C. Multiplexed Engineering and Analysis of  
1073 Combinatorial Enhancer Activity in Single Cells. *Mol Cell* **66**, 285-299 e285,  
1074 doi:10.1016/j.molcel.2017.03.007 (2017).
- 1075 46 Datlinger, P. *et al.* Pooled CRISPR screening with single-cell transcriptome readout. *Nat*  
1076 *Methods* **14**, 297-301, doi:10.1038/nmeth.4177 (2017).

## Figure 1

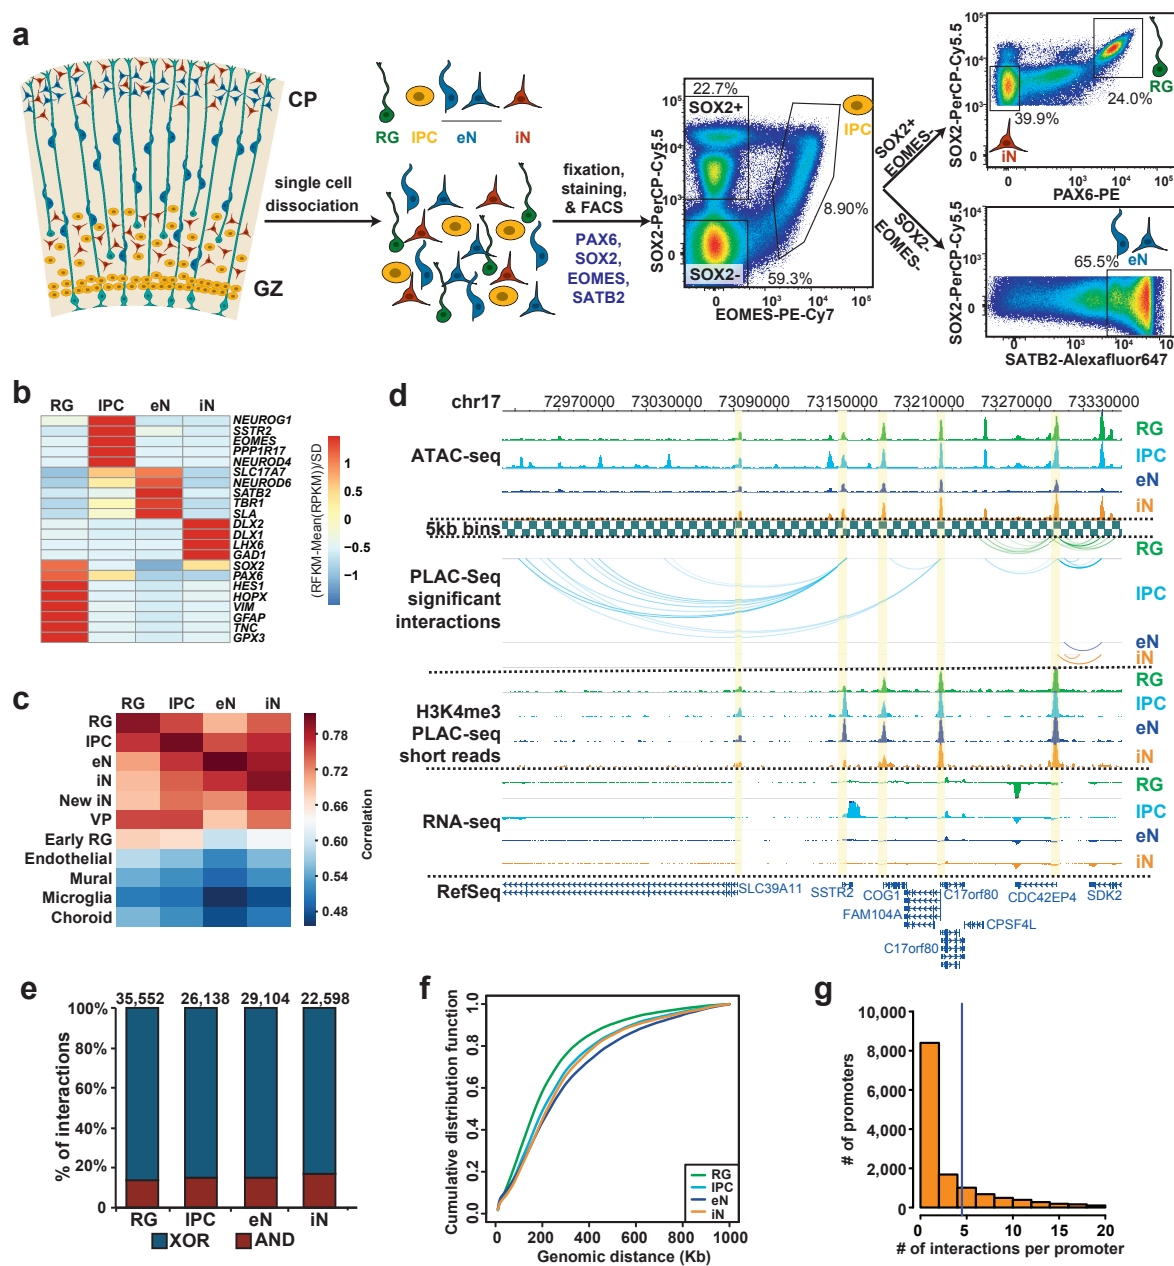

### Figure 1. Experimental design and general features of the 3D epigenomic landscape during corticogenesis.

(a) Schematic of the sorting strategy. Within the dorsal cortex, the germinal zone (GZ) is populated by radial glia (RG), which extend fibers towards the cortical plate (CP). These RG divide asymmetrically to produce intermediate progenitor cells (IPCs), which differentiate into excitatory neurons (eNs) that migrate along RG fibers towards the CP. At the same time, interneurons (iNs) can be found in both the GZ and CP. Microdissected GZ and CP samples were dissociated into single cells before being fixed, stained with antibodies for EOMES, SOX2, PAX6, and SATB2, and sorted using FACS. (b) Heatmap showing expression of key marker genes for RG, IPCs, eNs, and iNs. (c) Heatmap showing correlations between gene expression profiles for sorted cell populations and aggregate gene expression profiles from scRNA-seq datasets in the developing cortex. Cell types include newborn iNs from the medial ganglionic eminence (MGE), ventral progenitors including RG and IPCs from the MGE, microglia, and choroid plexus cells. (d) WashU Epigenome Browser snapshot of a 360 kb region (chr17:72,970,000-73,330,000) showing IPC-specific chromatin interactions linked to *SSTR2* expression in IPCs. (e) Bar graph showing counts of MAPS interactions, with proportions of XOR (blue, only one interacting bin contains H3K4me3 peaks) and AND (red, both interacting bins contain H3K4me3 peaks) interactions displayed for each cell type. (f) Cumulative distribution function (CDF) plots showing interaction distances for each cell type. (g) Histogram showing the numbers of MAPS interactions at each promoter for each cell type.

## Figure 2

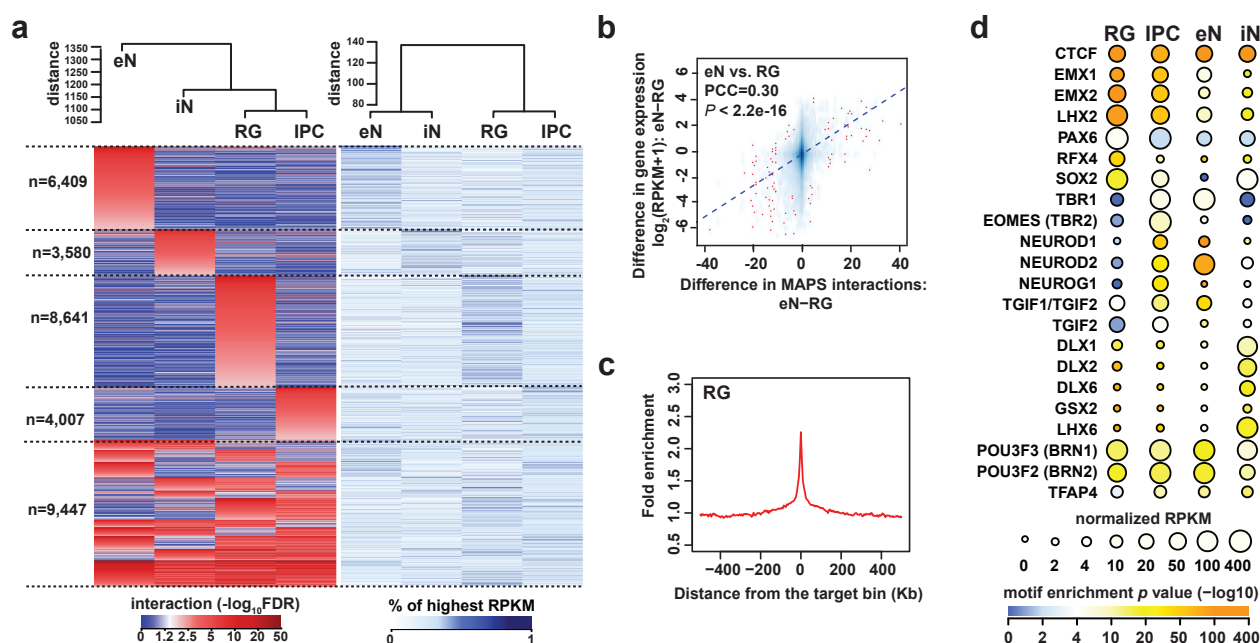

### Figure 2. H3K4me3-mediated chromatin interactions contribute to cell type-specific gene regulation.

(a) Heatmaps displaying interaction scores (left) and gene expression (right) for unique XOR interactions grouped according to their cell type specificity. Hierarchical clustering dendrograms for each heatmap are also shown (top).

(b) Scatterplot showing positive correlation between the difference in the number of MAPS interactions at each promoter and the difference in expression of the corresponding genes between RG and eNs (Pearson product-moment correlation coefficient, two-sided t-test,  $P < 2.2 \times 10^{-16}$ ). The fitted trendline based on linear regression is also shown.

(c) Fold enrichment of open chromatin regions over distance-matched background regions in 1 Mb windows around distal interacting regions for MAPS interactions in RG.

(d) Enrichment of TF motifs at open chromatin regions in cell type-specific interacting distal regions for each cell type. The color of each dot represents the degree of enrichment ( $-\log_{10} P$ -value) for each TF motif, and the size of each dot represents the gene expression of the corresponding TF.



### Figure 3

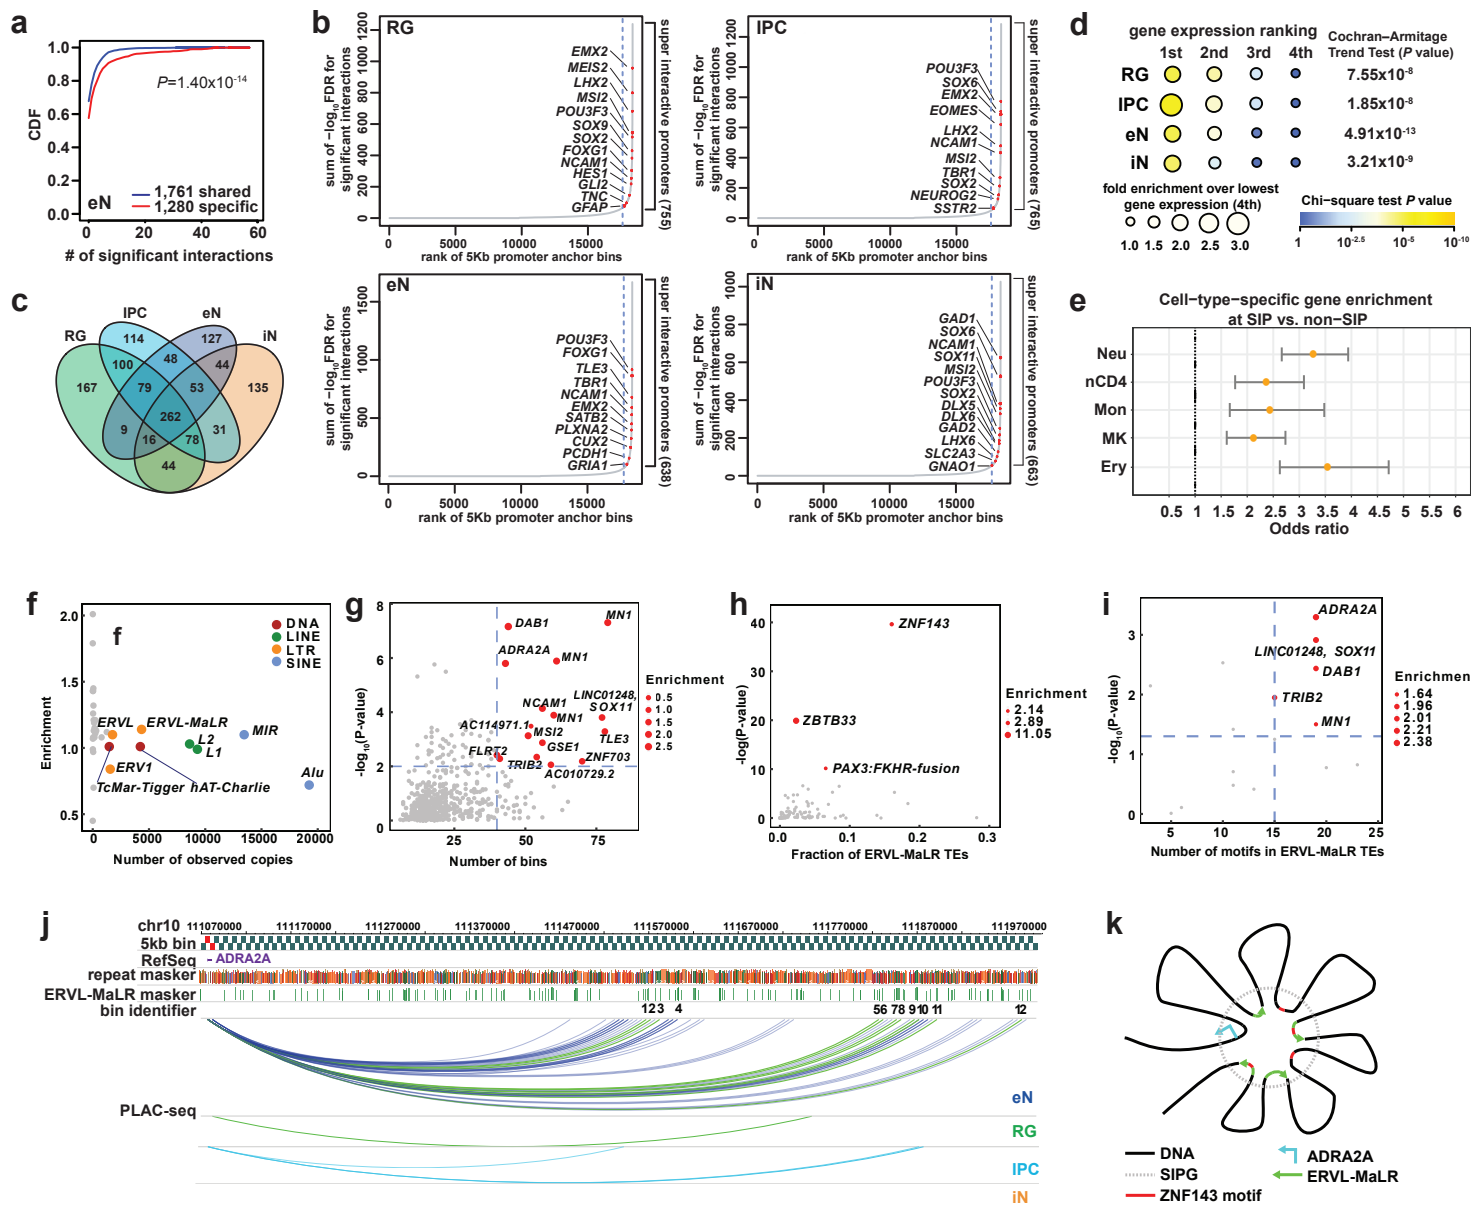

**Figure 3. Super interactive promoters are enriched for lineage-specific genes.**

(a) CDF plots showing the numbers of MAPS interactions for shared versus cell type-specific genes in eNs (two sample t-test, two-sided,  $P = 1.40 \times 10^{-14}$ ). (b) Plots showing the ranked cumulative interaction scores for 3D anchor bins in each cell type, defined as the sum of the  $-\log_{10}$  FDR for MAPS interactions coincident to each bin. Super interactive promoters (SIPs) are defined as promoters located to the right of the knee of each curve (dashed lines). Example SIPs, including those for lineage-specific genes, are highlighted for each cell type. (c) Venn diagram displaying the cell type-specificity of SIPs in RG, IPCs, eNs, and iNs. (d) The number of genes called as SIPs was divided by the total number of SIPs and non-SIPs for genes with the 1<sup>st</sup>, 2<sup>nd</sup>, 3<sup>rd</sup>, and 4<sup>th</sup> highest expression among all four cell types. The fold enrichment was calculated relative to the group with the 4<sup>th</sup> highest expression for each cell type. (e) Forrest plot showing that SIPs called in hematopoietic cells are also enriched for cell type-specific over shared genes. 95% confidence intervals are displayed. (f) Scatterplot showing both the enrichment and the number of observed copies of TE families in SIPGs for eNs. TE families occupying more than 1% of the genome are colored. (g) Scatterplot showing the enrichment of ERVL-MaLR TEs in SIPGs for eNs (hypergeometric P-value, see methods). SIPGs with 40 or more distal interacting bins and  $P < 0.01$  are highlighted. (h) Scatterplot showing the enrichment of TF motifs at ERVL-MaLR TEs in SIPGs highlighted in (g). Only TF motifs with length  $> 12$  bp are shown. (i) Scatterplot showing the enrichment of ZNF143 motifs at ERVL-MaLR TEs in SIPGs highlighted in (g) (Poisson distribution, see methods). ZNF143 motifs occurrences were detected using FIMO using a threshold of  $P = 0.0001$ . (j) WashU Epigenome Browser snapshot of the *ADRA2A* SIPG. MAPS interactions targeting the 12 distal interacting bins containing ERVL-MaLR-derived ZNF143 motifs are highlighted. (k) Potential mechanism for the contributions of TEs towards SIP formation.



**Figure 4**

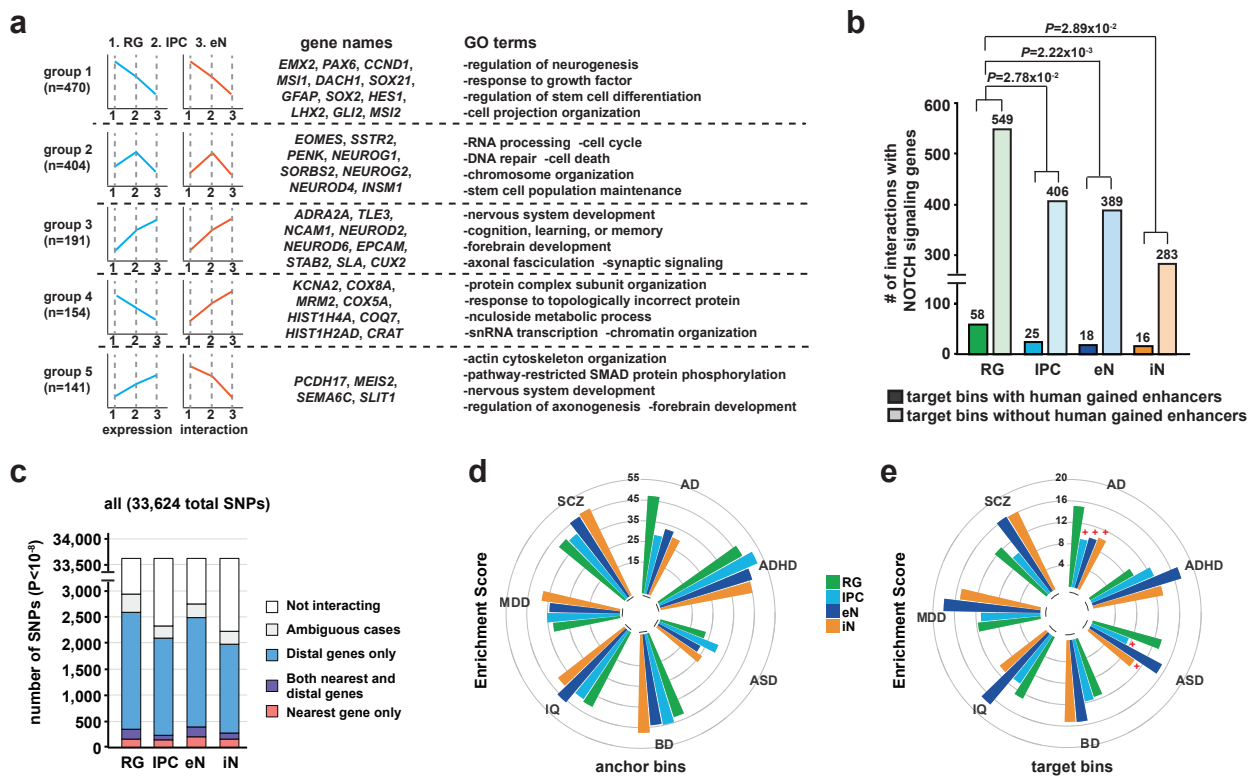

**Figure 4. Investigating developmental trajectories during corticogenesis and partitioning heritability for complex neuropsychiatric disorders and traits.**

(a) Gene groups identified based on their changes in expression and chromatin interactivity along the transition from RG to eNs. Group 1 represents stem cell genes with decreasing expression and chromatin interactivity from RG to eNs. Group 2 represents IPC-specific genes with the highest expression and chromatin interactivity at the IPC stage. Group 3 represents genes with increasing expression and chromatin interactivity from RG to eNs. Groups 4 and 5 are characterized by anti-correlated expression and chromatin interactivity and may represent late-silenced and early-silenced genes, respectively. Representative genes and GO terms are shown for each group. (b) Bar graph showing the numbers of MAPS interactions at Notch signaling genes targeting bins with and without human gained enhancers in each cell type (Chi-square test). (c) Bar graph showing the numbers of unique GWAS SNPs ( $P < 10^{-8}$ ) interacting with their nearest gene only, with both their nearest and distal genes, or with distal genes only for each cell type across all neuropsychiatric traits. (d-e) LDSC enrichment scores for each neuropsychiatric trait and cell type, stratified by 3D anchor and target bins. Results with  $P > 0.05$  are indicated.

## Figure 5

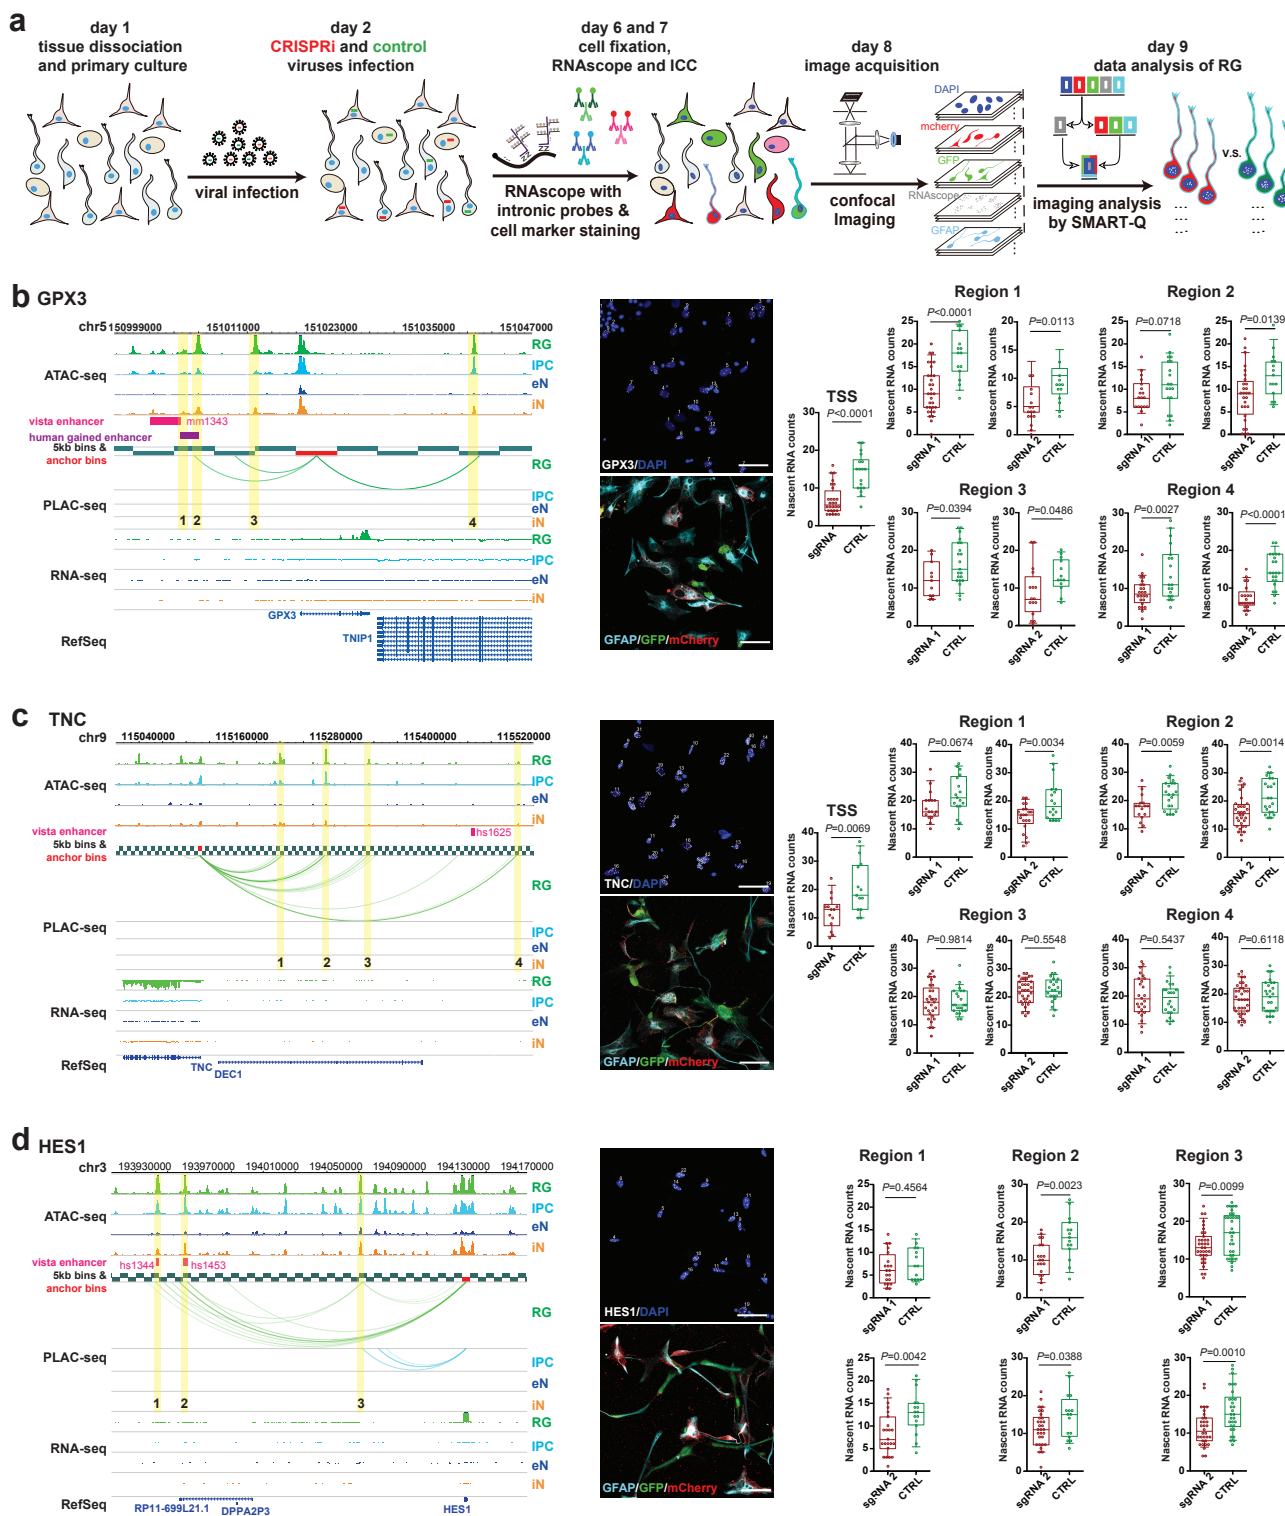

### Figure 5. Functional characterization of distal interacting regions using CRISPRview.

(a) CRISPRview workflow. Image analysis was performed using the SMART-Q pipeline. (b-d) Functional characterization of distal interacting regions at the *GPX3*, *TNC*, and *HES1* loci. For each locus, a WashU Epigenome Browser snapshot shows chromatin interactions bridging the promoters of *GPX3*, *TNC*, and *HES1* and distal interacting regions containing open chromatin regions (highlighted) which were targeted by sgRNAs for CRISPRi silencing. Representative images show staining for RNAscope probes targeting intronic regions for the genes of interest (white), DAPI (blue), the RG marker GFAP (light blue), mCherry (red), and GFP (green). The scale bar is 50  $\mu$ m. Box plots show the results of CRISPRi silencing for each targeted region. The open circles represent single cells, and nascent transcript counts for experimental (mCherry+) versus control (GFP+) sgRNA-treated RG are represented on the y-axis (Student's t-test, two-tailed). The median, upper and lower quartiles, and 10% to 90% range are indicated.

## Supplementary Figure 1

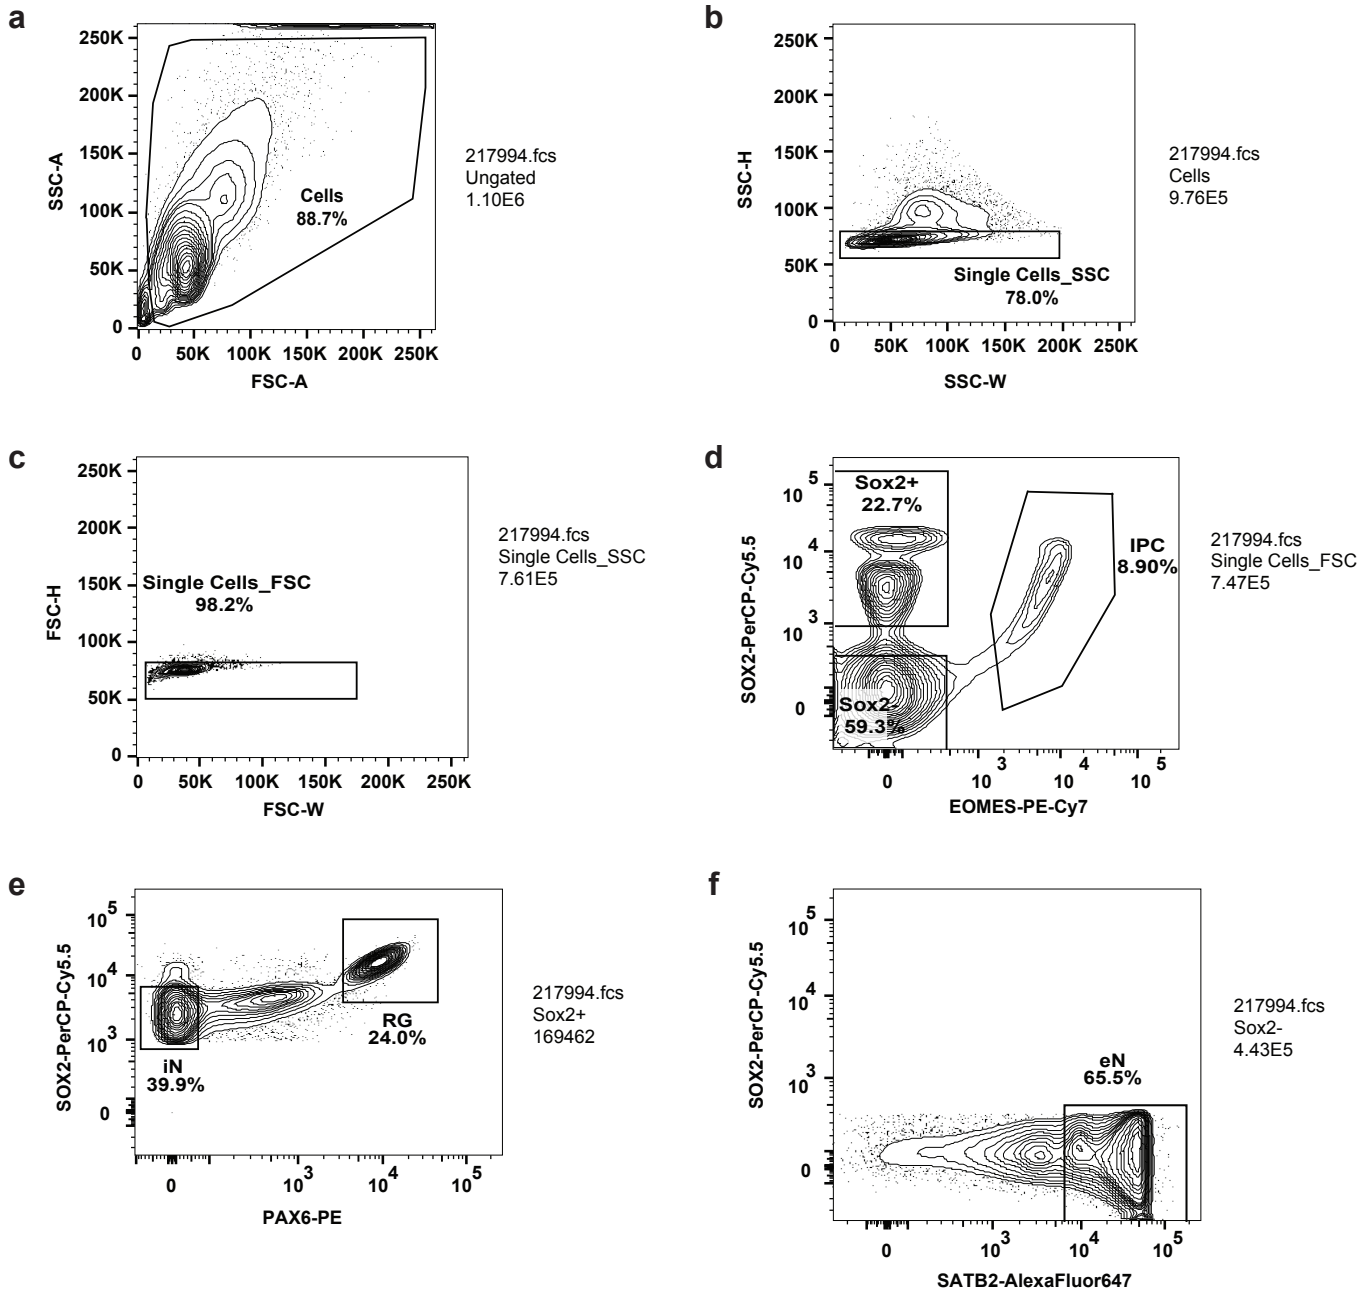

### Supplemental Figure 1. Representative contour plots depicting FACS gating strategy.

(a) Cells were separated from debris of various sizes based on the forward scatter area (FSC-A) and side scatter area (SSC-A). Cells were then passed through two singlet gates using the width and height metrics of the (b) side scatter (SSC-H versus SSC-W) and (c) forward scatter (FSC-H versus FSC-W). (d) SOX2<sup>+</sup>, and SOX2<sup>-</sup>, and intermediate progenitor (IPC) populations were isolated by gating on EOMES-PE-Cy7 and SOX2-PerCP-Cy5.5 staining. (e) Radial glia (RG) and interneurons (iNs) were isolated as high PAX6/high SOX2 and medium SOX2/low PAX6 populations, respectively. (f) Excitatory neurons (eNs) were isolated from the SOX2<sup>-</sup> population by gating on SATB2-Alexa Fluor 647 staining.

## Supplementary Figure 2

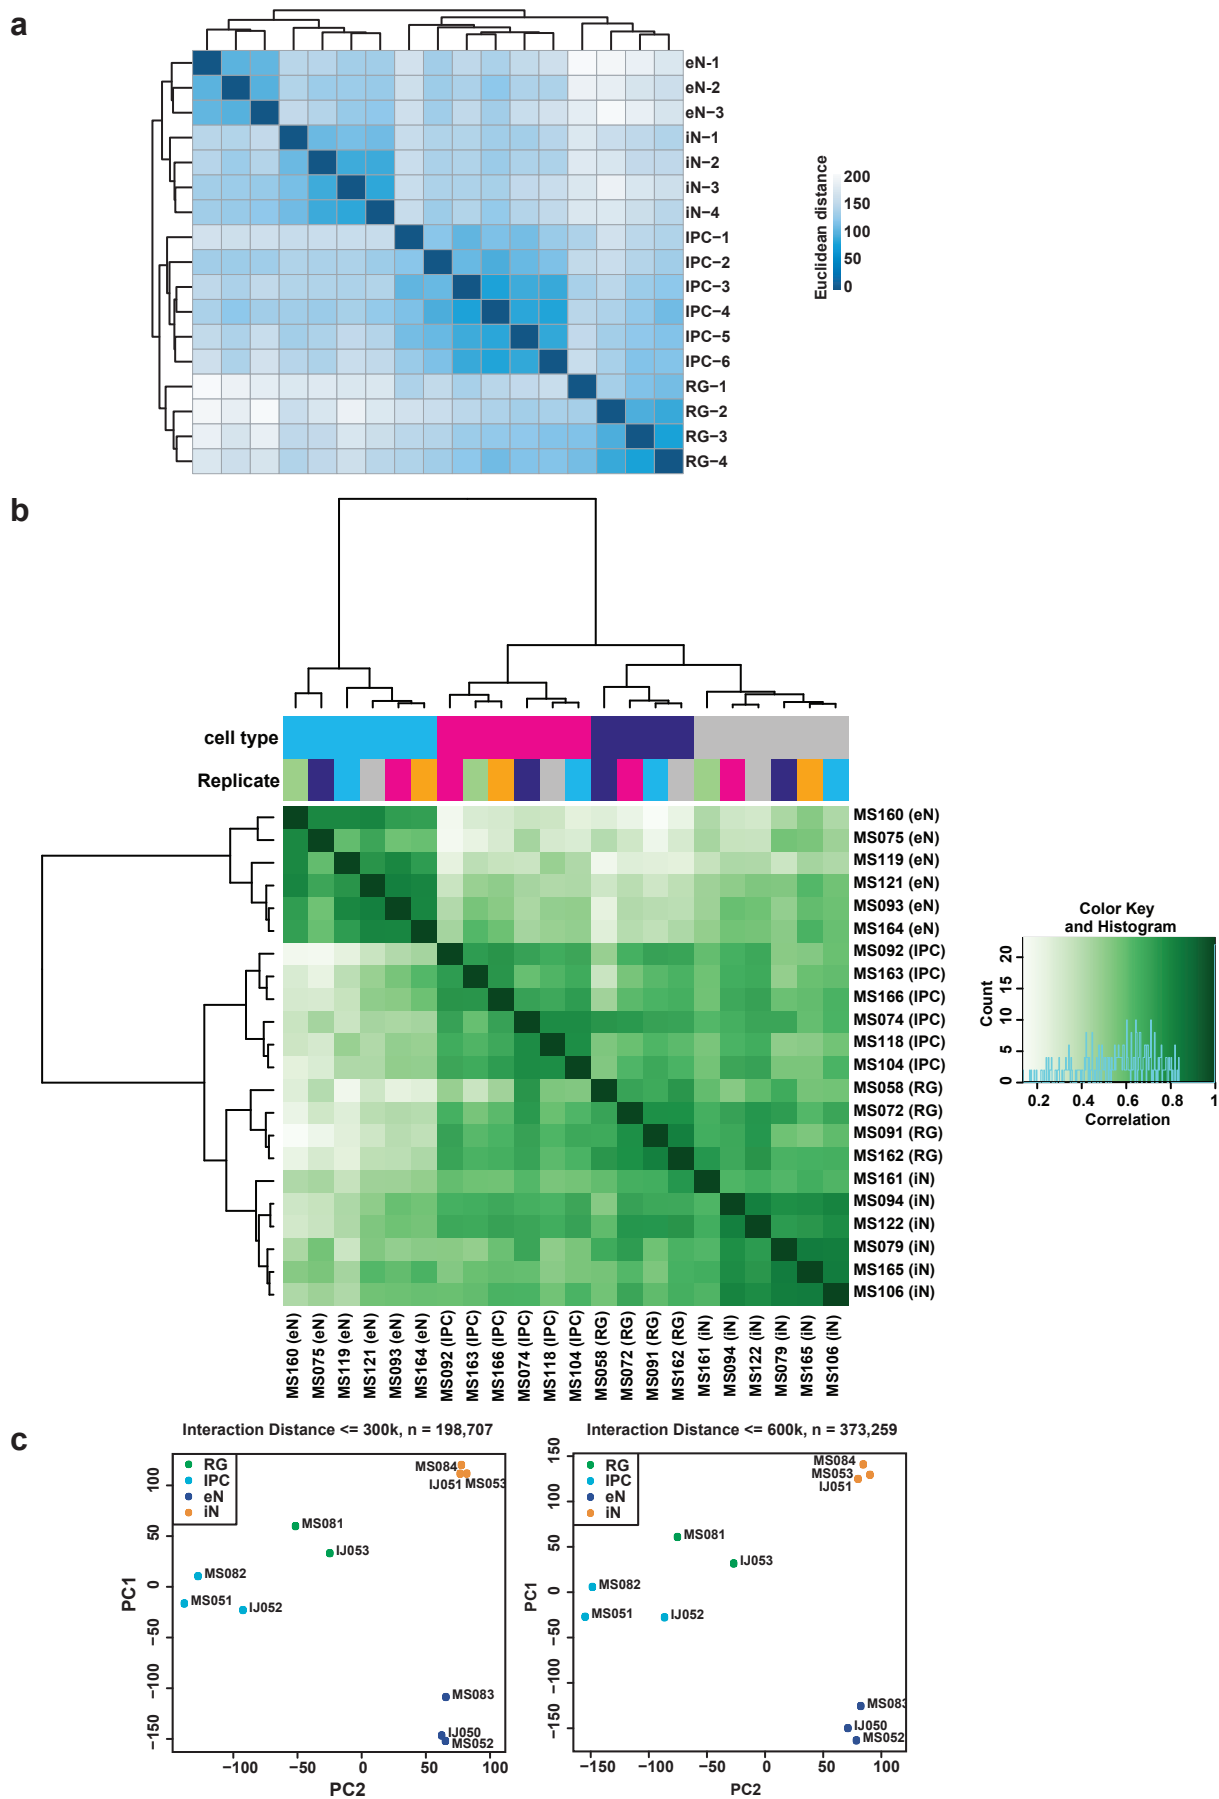

### Supplementary Figure 2. Reproducibility between replicates for RNA-seq, ATAC-seq, and PLAC-seq.

(a) RNA-seq replicates were hierarchically clustered according to gene expression sample distances using DESeq2.

(b) Heatmap with pairwise correlations and hierarchical clustering for read densities at the set of unified open chromatin regions for ATAC-seq replicates.

(c) Principle component analysis (PCA) was performed based on the normalized contact frequencies across all PLAC-seq replicates (see methods). To assess the robustness of the results, we conducted the analysis separately for bin pairs within 300 and 600 kb interacting windows.

## Supplementary Figure 3

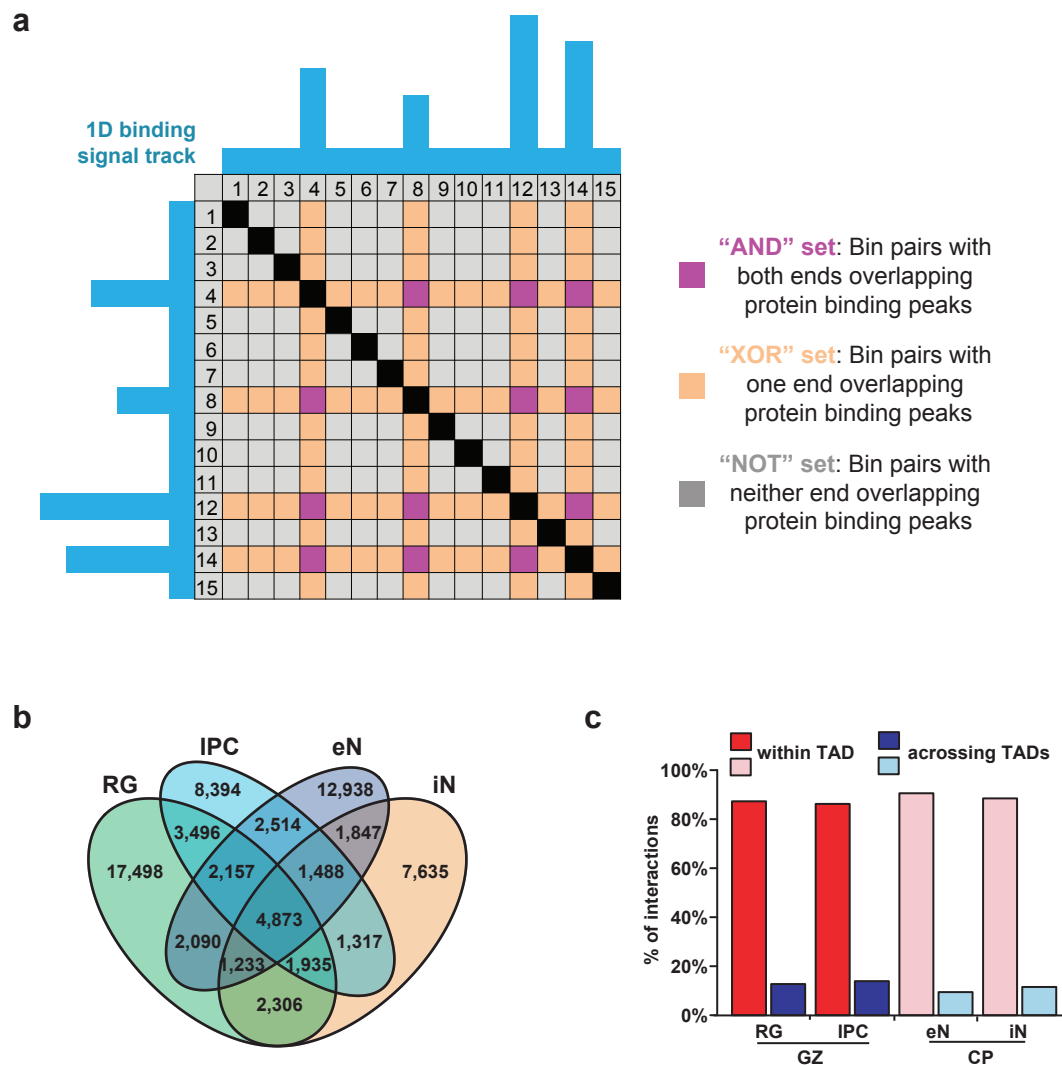

### Supplementary Figure 3. Identification of chromatin interactions using MAPS.

(a) Illustration of AND and XOR sets in a representative PLAC-seq contact matrix. The blue tracks represent 1D H3K4me3 peaks at bin positions 4, 8, 12, and 14. The black cells represent interactions within the same bin. The purple cells represent interactions in the AND set where both of the interacting bins contain 1D H3K4me3 peaks. The orange cells represent interactions in the XOR set where only one of the interacting bins contains 1D H3K4me3 peaks. The grey cells represent interactions where neither of the interacting bins contains 1D H3K4me3 peaks.

(b) Venn diagram displaying cell type-specificity of MAPS interactions for each cell type. (c) Proportions of MAPS interactions occurring within and across TADs in GZ and CP tissues for each cell type.

## Supplementary Figure 4

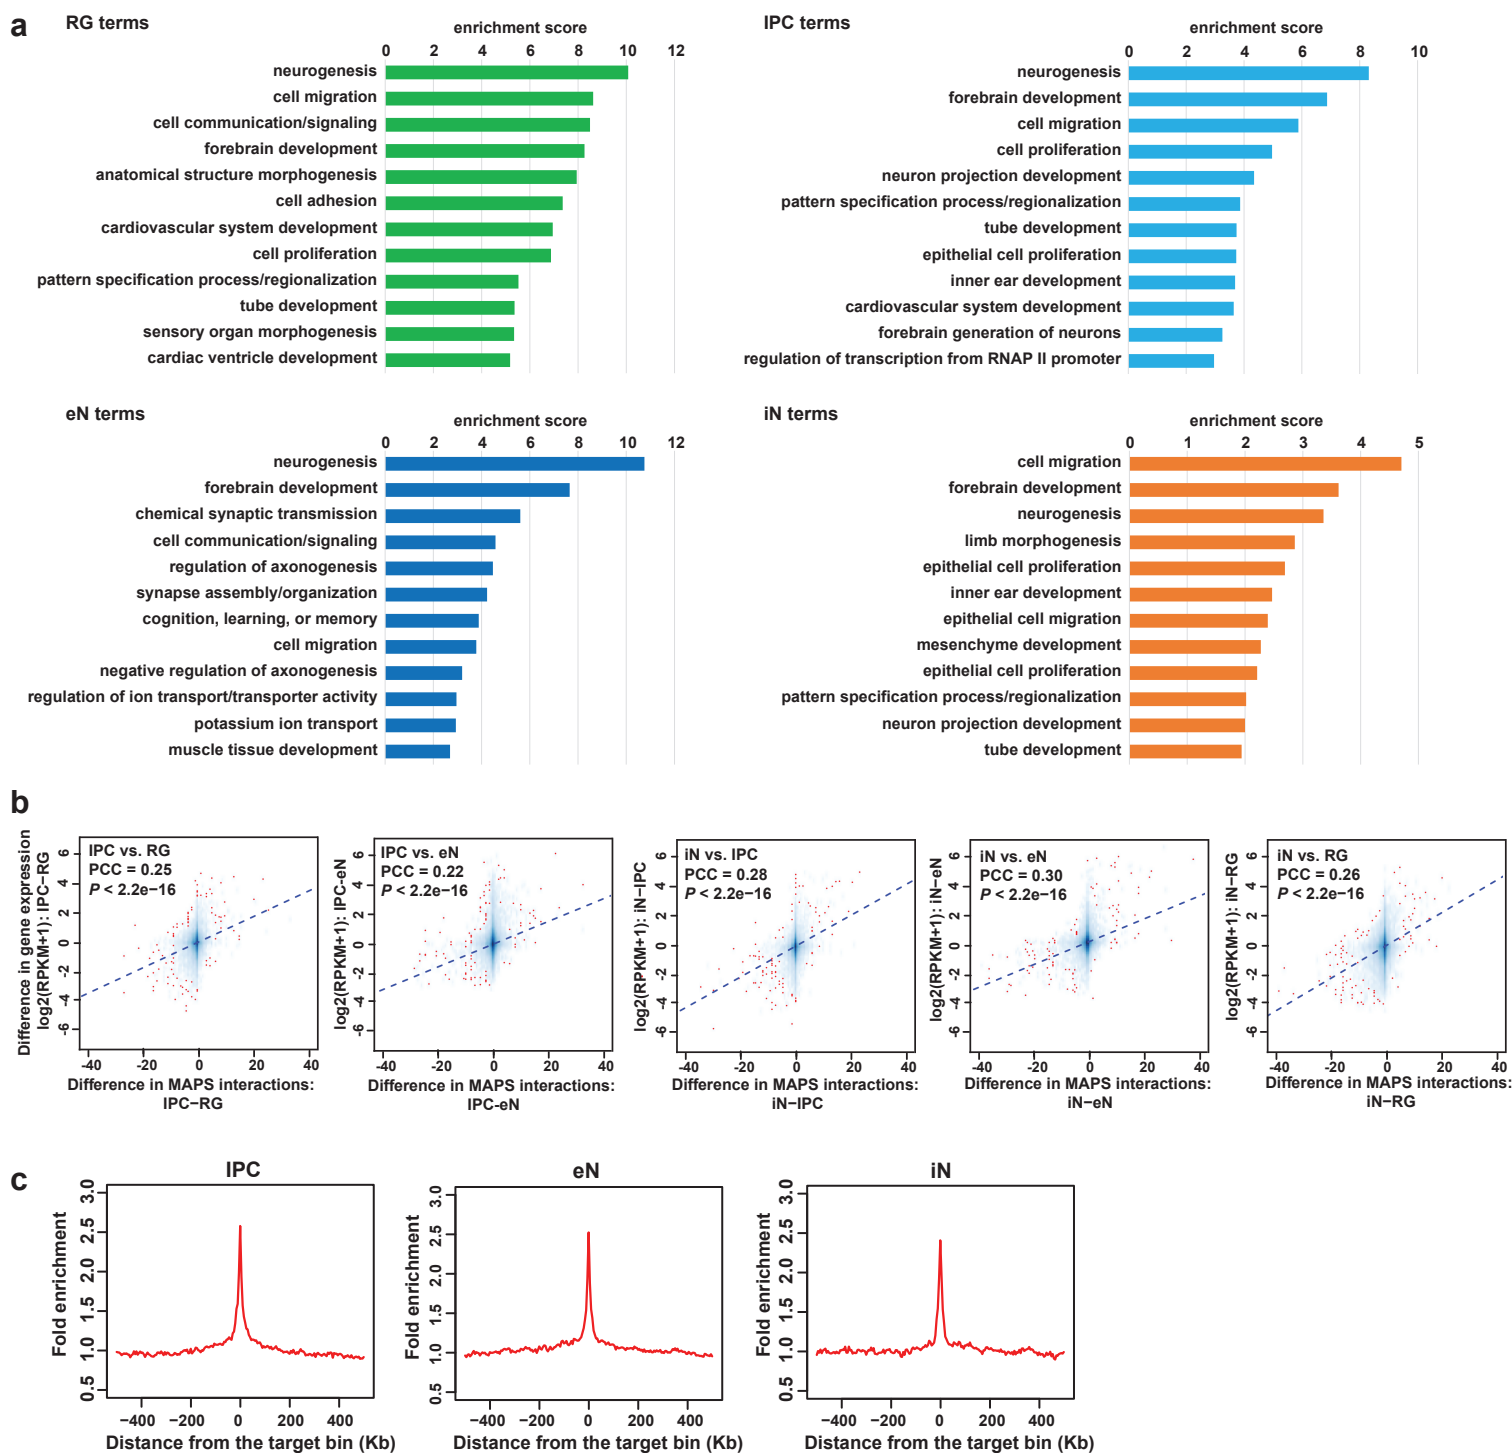

### Supplementary Figure 4. Contribution of 3D epigenomic landscapes to gene regulation.

(a) GO enrichment analysis for genes whose promoters participate in cell type-specific interactions. The top annotation clusters from DAVID are reported along with their enrichment scores for each cell type. (b) Scatterplots showing positive correlation between the difference in the number of MAPS interactions at each promoter and the difference in expression of the corresponding genes between all pairs of cell types (Pearson product-moment correlation coefficient, two-sided t-test,  $P < 2.2 \times 10^{-16}$  for all cell types). Fitted trendlines based on linear regression are also shown. (c) Fold enrichment of open chromatin regions over distance-matched background regions in 1 Mb windows around distal interacting regions for MAPS interactions in IPCs, eNs, and iNs.

## Supplementary Figure 5

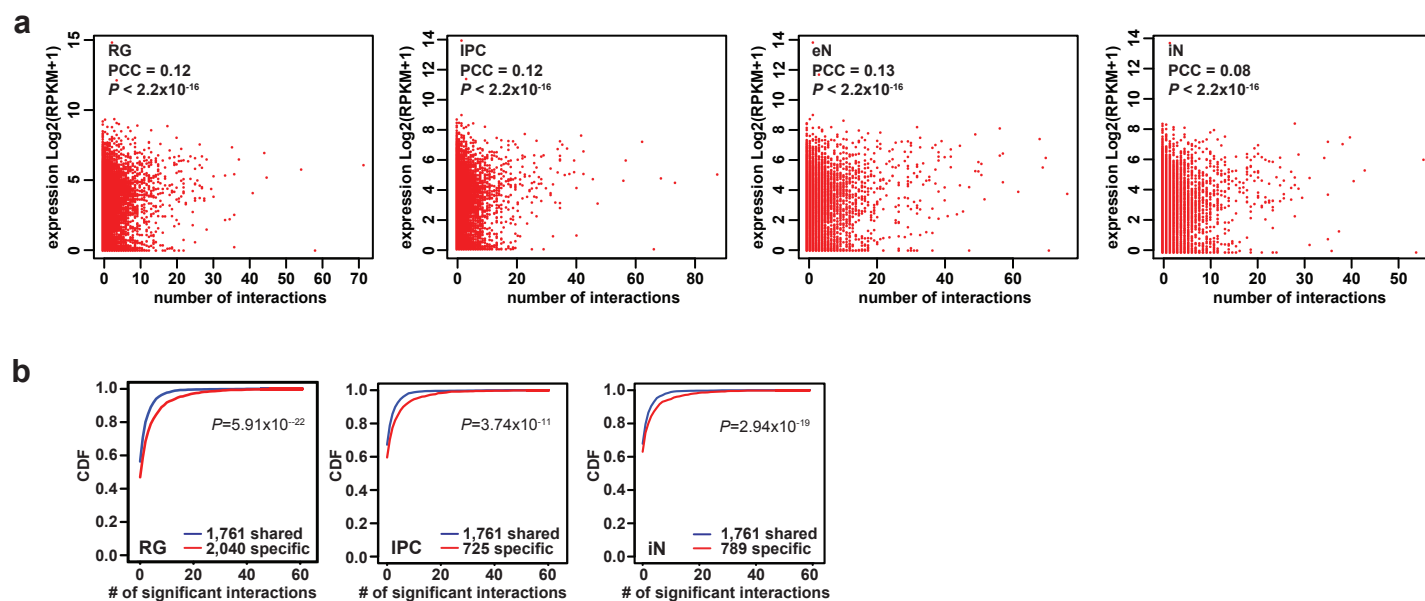

### Supplementary Figure 5. Correlations between chromatin interactions and gene expression for cell-type specific and shared genes.

(a) Scatterplots showing the correlation between numbers of MAPS interactions and gene expression at promoters in each cell type. (b) Cumulative distribution function (CDF) plots showing the numbers of MAPS interactions for shared versus cell type-specific genes in RG, IPCs, and iNs (two sample t-test, two-sided,  $P = 5.91 \times 10^{-22}$ ,  $3.74 \times 10^{-11}$ , and  $2.94 \times 10^{-19}$  for RG, IPCs, and iNs, respectively).



## Supplementary Figure 6

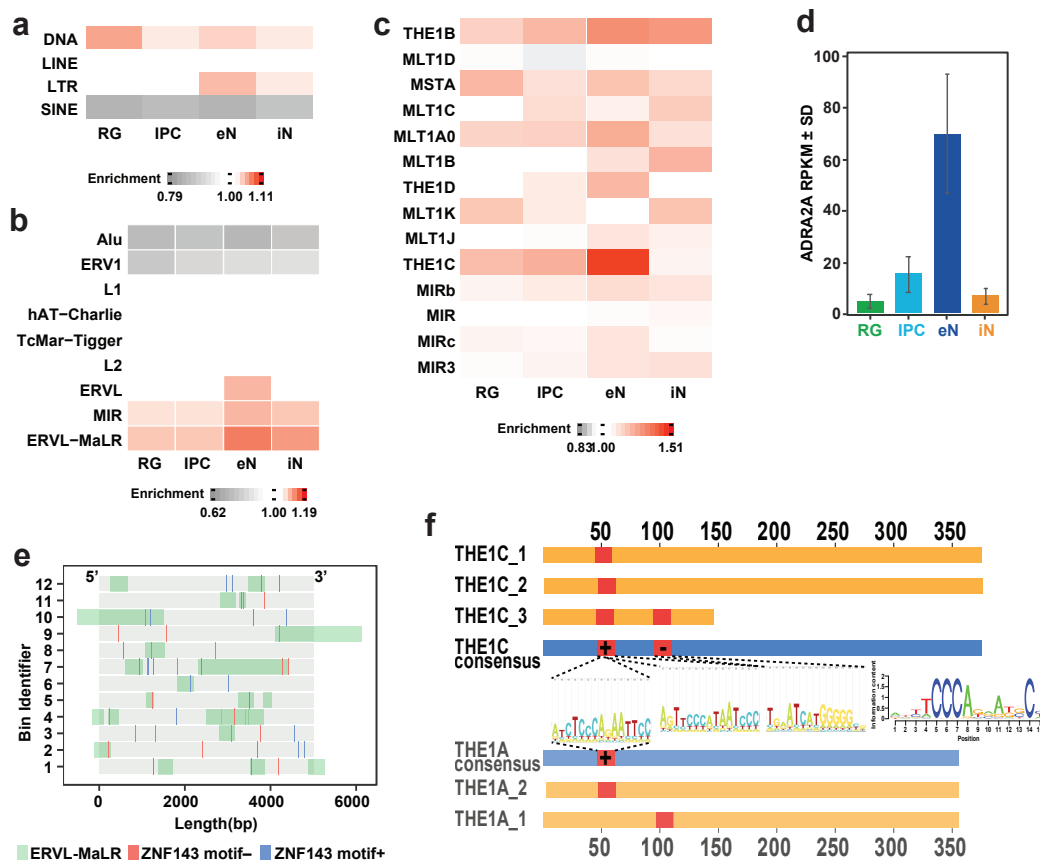

### Supplementary Figure 6. Specific families of transposable elements are implicated in SIP formation.

(a-c) Enrichment of TEs in SIPGs at the class (a), family (b), and subfamily (c) levels for each cell type. Only families occupying more than 1% of the genome are shown in (b). Only subfamilies from the MIR and ERVL-MaLR families occupying more than 0.1% of the genome are shown in (c). (d) Bar graph shows elevated *ADRA2A* gene expression in eNs. (e) Illustration of the 12 distal interacting regions in the *ADRA2A* SIPG containing at least one ERVL-MaLR-derived ZNF143 motif. ZNF143 motifs are indicated and colored by strand. The bin identifier corresponds to the labels in Fig. 3j. (f) Illustration of the conservation of ZNF143 binding motifs in ERVL-MaLR TEs. Blue bars indicate consensus sequences, yellow bars indicate individual copies of ERVL-MaLR TEs in the *ADRA2A* SIPG, and red bars indicate ZNF143 motifs. The positions of the ZNF143 motifs relative to the ERVL-MaLR TE sequences was determined using FIMO.

## Supplementary Figure 7

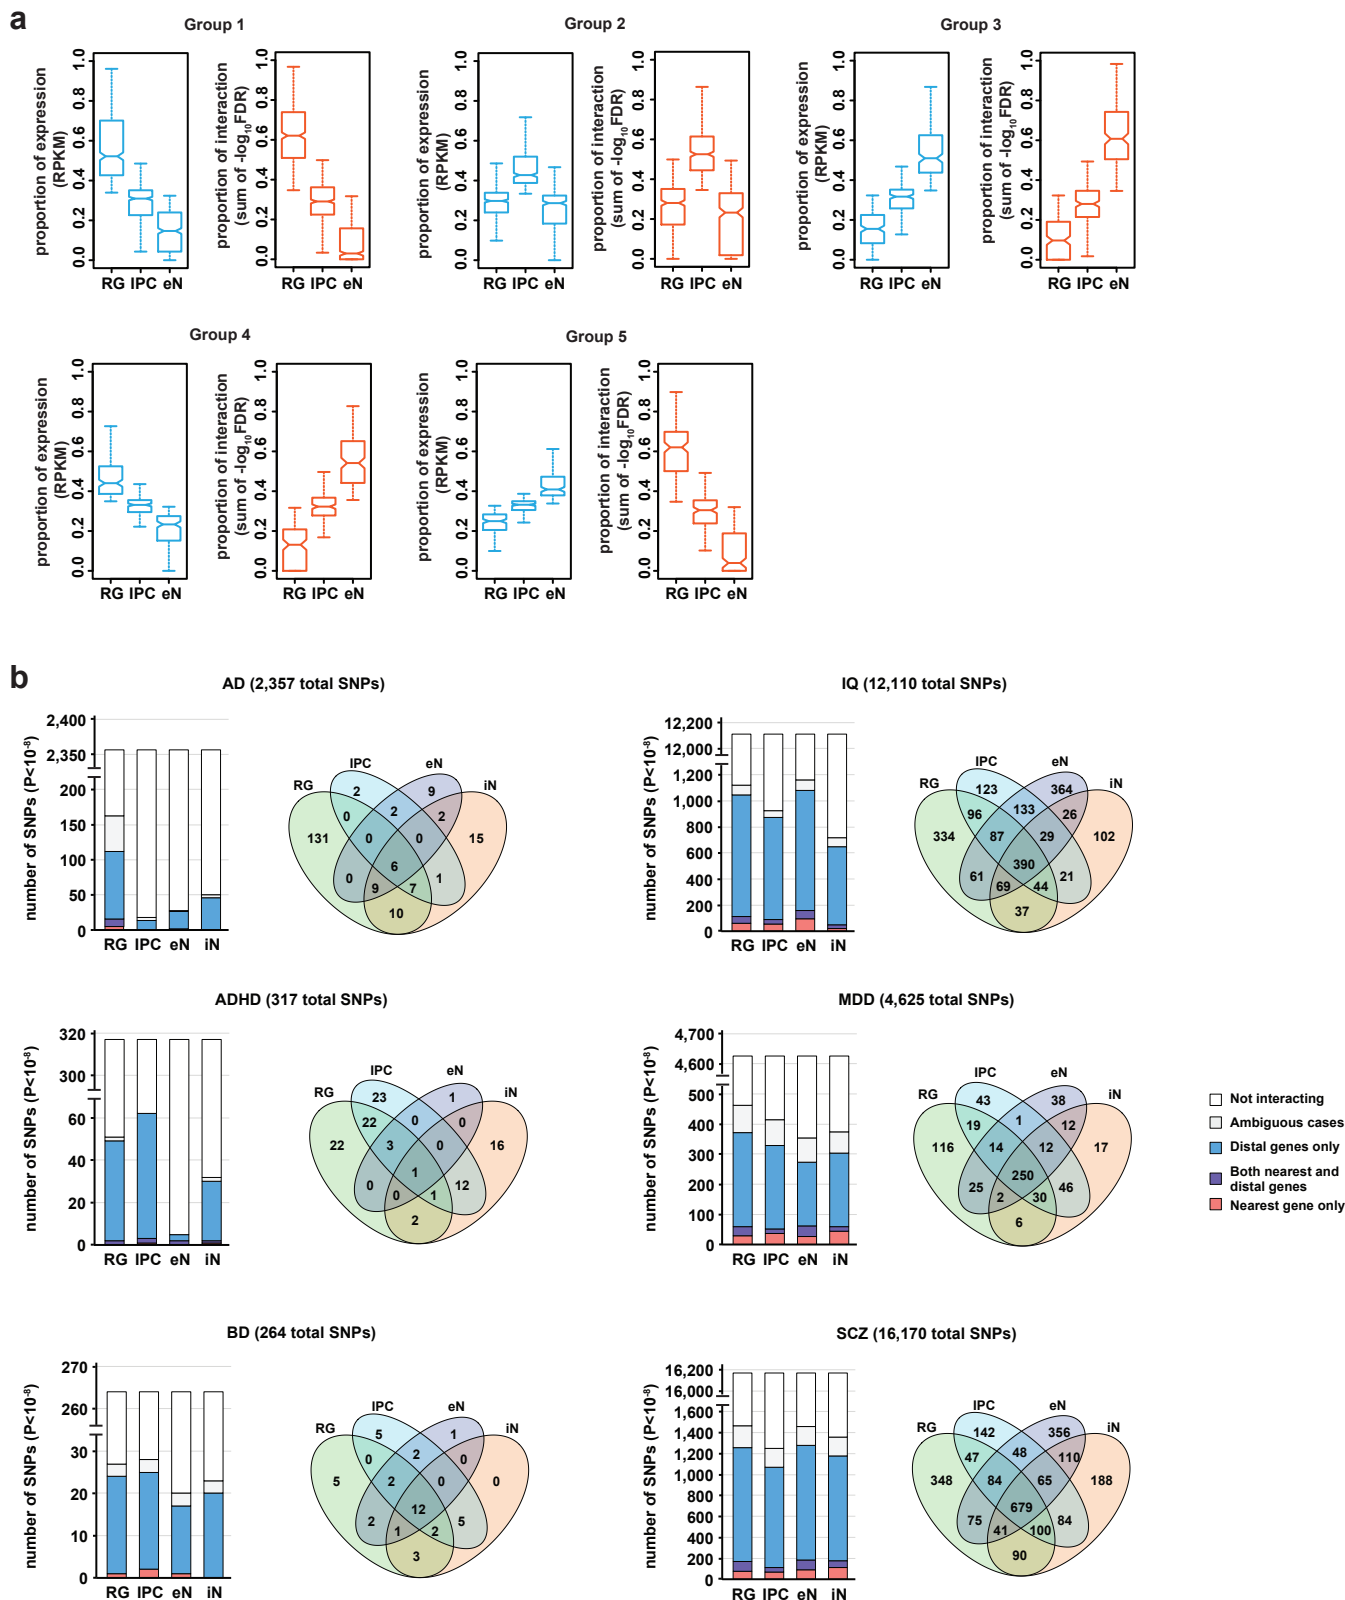

### Supplementary Figure 7. Developmental trajectories and annotations for complex neuropsychiatric disorder- and trait-associated variants.

(a) Box plots showing the distributions of gene expression and cumulative interaction scores for groups in Fig. 4. The median, upper and lower quartiles, minimum, and maximum are indicated. (b) Bar graphs showing the numbers of GWAS SNPs ( $P < 10^{-8}$ ) interacting with their nearest gene only, with both their nearest and distal genes, or with distal genes only for each cell type and neuropsychiatric trait. Venn diagrams display the cell type-specificity of all interacting GWAS SNPs for each neuropsychiatric trait.
